1 **Towards identifying subnetworks from FBF binding landscapes in *Caenorhabditis***

2 **spermatogenic or oogenic germlines**

3

4 Douglas F. Porter,<sup>\*,1,2</sup> Aman Prasad,<sup>\*,1</sup> Brian H. Carrick,<sup>\*</sup> Peggy Kroll-Connor,<sup>†</sup> Marvin

5 Wickens,<sup>\*</sup> and Judith Kimble<sup>\*,†,3</sup>

6

7 <sup>\*</sup>Department of Biochemistry, University of Wisconsin-Madison, Madison, Wisconsin

8 53706 and <sup>†</sup>Howard Hughes Medical Institute, University of Wisconsin-Madison,

9 Madison, Wisconsin 53706

10

11 <sup>1</sup>Contributed equally

12

13 <sup>2</sup>Present address: Department of Dermatology, Stanford University School of Medicine,

14 California 94305

15

16

17 Running title: FBF subnetworks

18 Key words: FBF, germline stem cell, iCLIP, sperm, oocyte

19 <sup>3</sup>Corresponding author:

20 Judith Kimble

21 Department of Biochemistry

22 University of Wisconsin-Madison

23 433 Babcock Drive

24 Madison, WI 53706-1544

25 Phone: 608-262-6188

26 Email: [jekimble@wisc.edu](mailto:jekimble@wisc.edu)

27

28 **Abstract**

29 Metazoan PUF (Pumilio and FBF) RNA-binding proteins regulate various biological  
30 processes, but a common theme across phylogeny is stem cell regulation. In  
31 *Caenorhabditis elegans*, FBF (*fem-3* Binding Factor) maintains germline stem cells  
32 regardless of which gamete is made, but FBF also functions in the process of  
33 spermatogenesis. We have begun to “disentangle” these biological roles by asking which  
34 FBF targets are gamete-independent, as expected for stem cells, and which are gamete-  
35 specific. Specifically, we compared FBF iCLIP binding profiles in adults making sperm to  
36 those making oocytes. Normally, XX adults make oocytes. To generate XX adults making  
37 sperm, we used a *fem-3(gf)* mutant requiring growth at 25°; for comparison, wild-type  
38 oogenic hermaphrodites were also raised at 25°. Our FBF iCLIP data revealed FBF binding  
39 sites in 1522 RNAs from oogenic adults and 1704 RNAs from spermatogenic adults. More  
40 than half of these FBF targets were independent of germline gender. We next clustered  
41 RNAs by FBF-RNA complex frequencies and found four distinct blocks. Block I RNAs were  
42 enriched in spermatogenic germlines, and included validated target *fog-3*, while Block II  
43 and III RNAs were common to both genders, and Block IV RNAs were enriched in oogenic  
44 germlines. Block II (510 RNAs) included almost all validated FBF targets and was enriched  
45 for cell cycle regulators. Block III (21 RNAs) was enriched for RNA-binding proteins,  
46 including previously validated FBF targets *gld-1* and *htp-1*. We suggest that Block I RNAs  
47 belong to the FBF network for spermatogenesis, and that Blocks II and III are associated  
48 with stem cell functions.

49

50 **INTRODUCTION**

51

52 RNA regulatory networks — defined by genome-wide interactions between RNA-binding  
53 proteins and their RNA targets — are central to biological control (Keene 2007; Ascano *et al.*  
54 2013; Ule and Darnell 2006; Ivshina *et al.* 2014). Among RNA-binding proteins analyzed  
55 at a genomic level for target RNAs, the PUF RNA-binding proteins (for Pumilio and FBF)  
56 have served as paradigms because of exquisite sequence-specificity and high affinity for  
57 their binding elements (Wang *et al.* 2001; Wang *et al.* 2002; Wang *et al.* 2009; Qiu *et al.*  
58 2012; Zhu *et al.* 2009). For example, each of five PUF proteins in *Saccharomyces cerevisiae*  
59 binds a battery of mRNAs, with some redundancy for targets in those networks but with  
60 key biological functions associated with each particular PUF (Gerber *et al.* 2004; Porter *et al.*  
61 2015; Wilinski *et al.* 2015). Metazoans also have one or more PUF proteins with  
62 multiple biological roles. An ancient and apparently common function of metazoan PUFs  
63 is stem cell maintenance (Wickens *et al.* 2002), but PUFs can also regulate sex  
64 determination, embryonic polarity, neurogenesis and learning, among their varied  
65 biological roles (Lin and Spradling 1997; Spradling *et al.* 2001; Crittenden *et al.* 2002;  
66 Wickens *et al.* 2002; Spassov 2004; Salvetti *et al.* 2005; Kaye *et al.* 2009; Vessey *et al.*  
67 2010; Campbell *et al.* 2012; Lander *et al.* 2012; Zhang *et al.* 1997; Zhang *et al.* 2017;  
68 Darnell 2013; Follwaczny *et al.* 2017). Moreover, mutations in the human PUM1 gene can  
69 lead to both developmental delay and seizures (Gennarino *et al.* 2018). The challenge now  
70 is to identify metazoan PUF subnetworks with distinct biological roles and to define those  
71 mRNAs whose regulation is critical for stem cells.

72 The *C. elegans* PUF paralogs, FBF-1 and FBF-2 (collectively known as FBF), are  
73 exemplars of metazoan PUF regulation. FBF-1 and FBF-2 are major regulators of germline  
74 stem cell maintenance (Crittenden *et al.* 2002), the hermaphrodite sperm-to-oocyte  
75 switch (Zhang *et al.* 1997), and the process of spermatogenesis (Luitjens *et al.* 2000). FBF

76 preferentially binds its targets in the 3'UTR in a sequence-specific fashion (Prasad *et al.*  
77 2016). The FBF binding element (FBE) is UGUNNNAU with the optimal FBE being  
78 UGUDHHAU, where D is A, U, or G and H is A, U, or C (Bernstein *et al.* 2005; Opperman *et al.*  
79 *et al.* 2005); moreover, cytosine residues located one or two positions upstream of the FBE  
80 (-1C or -2C) enhance affinity (Qiu *et al.* 2012). Like most PUF proteins, FBF recruits other  
81 proteins to its target mRNAs (Suh *et al.* 2009; Friend *et al.* 2012; Kraemer *et al.* 1999;  
82 Luitjens *et al.* 2000; Eckmann *et al.* 2002; Campbell *et al.* 2012; Shin *et al.* 2017) and is  
83 best known for decreasing RNA stability or repressing translation (Zhang *et al.* 1997;  
84 Crittenden *et al.* 2002; Merritt *et al.* 2008; Zanetti *et al.* 2012; Shin *et al.* 2017); however,  
85 FBF can also activate mRNAs (Kaye *et al.* 2009; Suh *et al.* 2009) and has been proposed to  
86 mediate the transition from self-renewal to differentiation via a switch from its repressive  
87 to its activating mode (Kimble and Crittenden 2007). Consistent with this idea, a regulated  
88 transition from PUF-mediated repression to activation was recently found for a yeast PUF  
89 (Lee and Tu 2015).

90 Previous genomic analyses of the network of RNAs associated with FBF-1 and FBF-2  
91 focused on adult oogenic germlines (Kershner and Kimble 2010; Prasad *et al.* 2016). Most  
92 relevant to this work were the iCLIP studies showing that FBF-1 and FBF-2 associate with  
93 largely the same mRNAs via the same binding sites (Prasad *et al.* 2016). Therefore, FBF-1  
94 and FBF-2 are not only biologically redundant for regulation of stem cells (Crittenden *et al.*  
95 *et al.* 2002), but these nearly identical proteins also control a common "FBF network".

96 Here we use iCLIP to compare FBF-bound RNAs in spermatogenic and oogenic  
97 germlines with the goal of identifying subnetworks responsible for individual FBF  
98 biological functions. Because FBF is essential for regulation of stem cells in both  
99 spermatogenic and oogenic germlines (Crittenden *et al.* 2002), we reasoned that  
100 identification of gamete-independent FBF target mRNAs might help define the FBF stem  
101 cell network. Conversely, spermatogenic-specific FBF target mRNAs might represent the  
102 FBF subnetwork responsible for spermatogenesis. We combine experimental and  
103 computational approaches to identify likely FBF targets and to propose subnetworks.  
104

## 105 MATERIALS AND METHODS

### 107 Nematode strains used in this study

108 JK4561: *fem-3(q22 ts,gf) IV*  
109 JK5181: *fbf-1(ok91) qSi232[3xflag::fbf-1] II*  
110 JK5182: *fbf-2(q738) qSi75[3xflag::fbf-2] II*  
111 JK5140: *fbf-1(ok91) qSi232[3xflag::fbf-1] II; fem-3(q22 ts,gf) IV/ nT1[qIs51](IV;V)*  
112 JK5545: *fbf-2(q738) qSi75[3xflag::fbf-2] II; fem-3(q22 ts,gf) IV/ nT1[qIs51](IV;V)*  
113

114 **Generation and maintenance of strains carrying epitope-tagged FBF-1 and FBF-2**  
115 **transgenes.** Strains JK5181 and JK5182 were generated previously (Prasad *et al.* 2016).  
116 Briefly, the *qSi232* (3xFLAG::FBF-1) and *qSi75* (3xFLAG::FBF-2) transgenes were created by  
117 the method of *Mos1*-mediated single copy insertion (*MosSCI*) (Frøkjær-Jensen *et al.* 2008)  
118 and placed into strains lacking *fbf-1* or *fbf-2* respectively. Like wild-type, these strains are  
119 oogenic as adults; the primary difference is that they carry a FLAG-tagged FBF so that we  
120 can do iCLIP. To generate spermatogenic adults, we used genetic crosses to introduce the  
121 temperature gain-of-function allele, *fem-3(q22 ts,gf)*, and thereby generated JK5140 and  
122 JK5545. This *fem-3* mutant is spermatogenic when grown at 25° from the first larval stage  
123 (L1) (Barton *et al.* 1987), and strains generated with tagged FBF were similarly

124 spermatogenic at 25°. This *fem-3* allele is a T-to-C mutation near one of two 3'UTR FBEs  
125 (CGCTTCTTGTGTCAT to CGCTCCTTGTGTCAT; FBE underlined, mutation underlined and  
126 italicised). To compare oogenic and spermatogenic iCLIP datasets, both oogenic and  
127 spermatogenic animals were maintained at 15° for propagation and shifted to 25° from  
128 the L1 stage for iCLIP.

129  
130 **iCLIP.** iCLIP was carried out with modifications for *C. elegans*, as previously described  
131 (Huppertz *et al.* 2014; Prasad *et al.* 2016). Single-end sequencing was performed on an  
132 Illumina HiSeq 2000. Data is available in the NCBI GEO database, accession GSE83695.

133  
134 **Data processing.** Fastq files were split by barcode and 3' linker and reverse transcription  
135 primer sequences were clipped. The barcode was then removed from the read sequence  
136 and moved to the read name. Reads were mapped to the genome using STAR and CSEQ  
137 parameters (Dobin *et al.* 2013; Kassuhn *et al.* 2016), except alignment was local, rather  
138 than end-to-end. Reads mapping to multiple places by STAR or mapping with a STAR-  
139 reported score below 20 were removed. Duplicates were removed using scripts from  
140 Weyn-Vanhentenryck *et al.* (2014) applied to the barcode sequence found in read names.  
141 Reads were assigned to RNAs by HTSeq (Anders *et al.* 2015) and initial differential  
142 expression analysis was performed by DESeq2 (v. 1.18.1.). Peaks were called as described  
143 previously (Prasad *et al.* 2016), except that two reads-in-peak cutoffs were applied: one  
144 cutoff by per-million normalized read number (2-fold or higher), and one by un-  
145 normalized read number (5-fold or higher). The exact cutoffs varied between datasets  
146 and are included in File S2. We used the same criteria as described previously to  
147 determine cutoffs (Prasad *et al.* 2016). Specifically, cutoffs were chosen to retain all  
148 validated targets, maximize enrichment of the binding site, and identify as many potential  
149 targets as possible. HOMER (Heinz *et al.* 2010) was performed using the highest 500  
150 peaks, with the single parameter “-rna”.

151  
152 **Generation of “FBF” replicates for 25° datasets.** One FBF-1 biological replicate from 25°  
153 oogenic worms had fewer reads than the other five for this strain (two for FBF-1 and three  
154 for FBF-2), although the other FBF-1 replicates are large enough that the FBF-1 dataset is  
155 still larger than the FBF-1 dataset (Figure S1A, File S2). To generate replicates of more  
156 comparable size, we combined iCLIP reads for FBF-1 and FBF-2 to generate three more  
157 equally sized FBF replicates. We did not face a similar problem with replicates from  
158 spermatogenic animals (Figure S1B), but similarly combined these as well.

159  
160 **Clustering method.** We first normalized each of our iCLIP datasets to reads-per-million so  
161 that reads-per-RNA represented the frequency of binding at a given RNA. We then  
162 subtracted the average of the negative controls from each FBF iCLIP dataset, and finally  
163 converted all counts to a  $\log_2$  scale. We calculated distances between binding frequencies  
164 for each FBF-RNA pair by Euclidean distance and clustered those distances by simple  
165 hierarchical clustering (Eisen *et al.* 1998). Euclidean distance is a generalization of the  
166 notion of distance as the length of a straight line between two points. In our case, the  
167 distance between two RNAs *A* and *B* is the distance between the vectors of FBF binding  
168 (each FBF iCLIP replicate being one dimension of the vector) at *A* and *B*. We used  
169 Euclidean distance between reads-per-million counts, rather than normalizing each RNA  
170 to have the same average number of reads, so that we could cluster according to both  
171 frequency of binding and the dependency of binding on germline gender. Distance

172 metrics were used to generate clusters using pairwise average-linkage cluster analysis  
173 (Sokal and Michener 1958), in which distances between clusters are simply defined as the  
174 average of all distances between elements in a cluster *A* with all elements in a cluster *B*.

175

176 **DESeq2.** A read was assigned to an RNA if and only if it overlapped with an exon of the  
177 corresponding gene. DESeq2 (v. 1.18.1) results were generated as described in the  
178 DESeq2 documentation, using default parameters of the DESeq function, which set  
179 minimum read depths based on maximizing the genes passing a given FDR. We used an  
180 FDR of 0.01. DESeq-reported p-values are Benjamini-Hochberg-adjusted. We applied  
181 DESeq2 analysis to compare the effect of both gender and of temperature. In either case,  
182 we restricted our analysis to those RNAs identified as part of the spermatogenic or  
183 oogenic program (Noble *et al.* 2016).

184

185 **Worm-human PUF target comparison.** We used a compendium of *C. elegans* genes with  
186 human orthologs (Shaye and Greenwald 2011) to identify which FBF target RNAs encode  
187 proteins with human counterparts. We compared these FBF targets to PUM2 targets  
188 identified by PAR-CLIP in human embryonic kidney cells (Hafner *et al.* 2010) and to PUM1  
189 and PUM2 targets identified by iCLIP during mouse neurogenesis (Zhang *et al.* 2017). An  
190 FBF target was defined as shared with PUM if (1) any mammalian ortholog was targeted  
191 by PUM, (2) there were no more than ten mammalian orthologs (such limits have been  
192 used previously for cross-phyla comparison (Hogan *et al.* 2015)), and (3) there were no  
193 more than ten *C. elegans* genes orthologous to the same mammalian ortholog. We  
194 treated orthology as a transitive property: if nematode genes “A” and “B” are listed as  
195 orthologs in Shaye and Greenwald (2011) to mammalian genes that overlap by at least  
196 one gene, then “A” and “B” were treated as if they were a single gene for calculating  
197 overlap. The same method of combining orthologs was applied to the mammalian gene  
198 set (if two mammalian genes overlap in worm orthologs, they were combined).

199

200 **Statistical analysis.** All statistical methods for determining FBF-RNA interactions were as  
201 described in Prasad *et al.* (2016). Briefly, reads in the 500-bp region around a peak were  
202 placed in 50-bp bins for both FBF iCLIP and no-antibody iCLIP control data. The negative  
203 control was modelled as a Gaussian to calculate a p-value as the chance of observing a  
204 peak at the given height from the negative control data. All p-values were then Benjamini-  
205 Hochberg corrected and an FDR cutoff of 1% applied, before applying the two ratio cutoffs  
206 described above. Statistics used for DESeq2 fold-change estimates and target comparison  
207 are described above.

208

209 **Data Availability.** Strains are available upon request. Scripts used to analyze the data  
210 were uploaded to [github.com/dfporter/FBF\\_gendered\\_gl](https://github.com/dfporter/FBF_gendered_gl). Sequencing data is available in  
211 the NCBI GEO database, accession GSE83695. To replicate the combined 25° FBF datasets  
212 from individual FBF-1 and FBF-2 replicates, first obtain the individual replicates from  
213 GSE83695, and concatenate 25° oogenic FBF-1/FBF-2 replicates in the order 1/3, 2/2, and  
214 3/1; then concatenate 25° spermatogenic FBF-1/FBF-2 replicates in the order 2/1, 1/2,  
215 and 3/3. The 20° FBF iCLIP data from Prasad *et al.* (2016) is available at GSE76136. File S1  
216 contains FBF iCLIP peaks. File S2 contains metrics such as complexity for FBF iCLIP peaks.  
217 File S3 contains GO terms for FBF targets. File S4 describes RNAs significantly differing  
218 between spermatogenic and oogenic in FBF iCLIP. File S5 contains the dataset displayed  
219 in Figure 3A, namely FBF binding per gene for 2,111 FBF target RNAs. File S6 contains the



220 blocks defined in Figure 3. Finally, File S7 contains FBF targets overlapping with the human  
221 PUF protein PUM2.

222

## 223 RESULTS AND DISCUSSION

224

225 **Generation of FBF iCLIP datasets from spermatogenic and oogenic germlines.** We  
226 generated FBF-1 and FBF-2 iCLIP datasets from animals with somatic tissues of the same  
227 gender but germline tissue of opposite gender (Figure 1, A and B). All animals were  
228 chromosomally XX and had hermaphroditic somatic tissues, including the somatic gonad;  
229 they also had comparable numbers of germline stem cells but those stem cells generated  
230 either only oocytes or only sperm, depending on the strain. For each FBF, we used an N-  
231 terminal 3XFLAG-tagged single copy transgene in a strain lacking the endogenous gene  
232 (e.g. FLAG::FBF-1 in an *fbf-1* null mutant). As reported before (Prasad *et al.* 2016), *fbf(0)*  
233 FLAG::FBF XX animals are essentially wild-type. Moreover, each tagged FBF rescues *fbf-1*  
234 *fbf-2* double mutants from 100% sterility due to lack of GSCs to 100% fertility due to  
235 rescue of the GSC defect (Prasad *et al.* 2016). These tagged FBFs should therefore interact  
236 in an essentially normal fashion with their target RNAs.

237 XX adults with a spermatogenic germline were obtained using a temperature  
238 sensitive gain-of-function (*gf*) *fem-3* mutant (Barton *et al.* 1987). We crossed transgenes  
239 encoding 3XFLAG-tagged FBF-1 or FBF-2 into the *fem-3(gf)* mutant strain, and again  
240 removed the corresponding endogenous *fbf* gene in each strain. As expected, the final  
241 strains, *fbf-1(0) FLAG::FBF-1; fem-3 (gf)* and *fbf-2(0) FLAG::FBF-2; fem-3 (gf)*, were self-  
242 fertile at permissive temperature (15°), but fully spermatogenic at restrictive temperature  
243 (25°). Because the previously reported oogenic FBF iCLIP was done with animals raised at  
244 20° (Prasad *et al.* 2016), we repeated it here with animals grown at 25°. Thus, we  
245 performed FBF iCLIP from adults that were either oogenic or spermatogenic, both raised  
246 at 25°. For each strain (each FBF, each germline gender), we processed three biological  
247 replicates. In parallel, we produced three negative control replicates for each germline  
248 gender by omitting the FLAG antibody from the beads during immunopurification.

249

250 **Targets, networks and subnetworks: definitions.** Throughout this work, we define the  
251 term “target RNAs” empirically as RNAs that interact with FBF after cross-linking in living  
252 animals, followed by immunoprecipitation from lysate and deep sequencing (CLIP). We  
253 define “network” to encompass all RNA targets observed by CLIP, and “sub-network” as  
254 a subset of that broader network. We refer to RNAs whose expression is regulated by FBF  
255 as “validated targets”. Such validation relies on genetic, biochemical and cellular analyses  
256 that have been done by ourselves and others in previous studies. We note that virtually  
257 all validated FBF targets are among the targets identified in this work by FBF CLIP (see  
258 below).

259

260 **Peak calling and generation of quality datasets for comparison.** This work takes  
261 advantage of three sets of FBF iCLIP data (Figure 1B). To analyze these datasets, we  
262 modified our earlier peak calling pipeline (Prasad *et al.* 2016) to include a step that  
263 collapses duplicate reads while accounting for sequencing errors (Weyn-Vanhentenryck  
264 *et al.* 2014) (see Materials and Methods). This modified pipeline generated lists of FBF-1  
265 and FBF-2 target RNAs in oogenic animals raised at 25° and spermatogenic animals raised  
266 at 25°, as well as revised lists of FBF-1 and FBF-2 targets in oogenic animals raised at 20°.

267 File S1 lists iCLIP peaks obtained for each condition, and File S2 presents metrics of dataset  
268 size and quality.

269 The primary motivation for this work was comparison of FBF targets in spermatogenic  
270 and oogenic germlines, with the goal of identifying gamete-independent and gamete-  
271 specific targets that might inform about FBF subnetworks. Such comparisons are best  
272 done with datasets of comparable size. For iCLIP data of animals raised at 25°, we initially  
273 called peaks for FBF-1 and FBF-2 separately (File S1, Figure S1A-C), but one 25° FBF-1  
274 replicate from oogenic germlines had a low number of unique and uniquely mapping  
275 reads (13,486, File S2). Because of the similarity of FBF-1 and FBF-2 binding (Prasad *et al.*  
276 2016; this work) and the increased sensitivity of using larger datasets, we combined the  
277 FBF-1 and FBF-2 25° iCLIP datasets to generate “FBF” datasets for each gender (see  
278 Materials and Methods). Although the differences between FBF-1 and FBF-2 merit future  
279 investigation, combining datasets allowed us to more easily compare FBF binding at 25°  
280 between genders. These FBF target lists comprised 1,522 RNAs for oogenic animals, and  
281 1,704 RNAs for spermatogenic animals (Figure 2A, File S1).

282 The quality of the datasets analyzed in this work was high by two key criteria. First,  
283 the majority of peaks in each dataset contained the canonical FBE (UGUNNNNAU), a  
284 percentage that rose to roughly 90% for the top 500 peaks (Figure 1C). An “optimal” form  
285 of the FBE is an upstream “C” followed by UGURCCAUR, where “R” represents a purine  
286 (Prasad *et al.* 2016). Indeed, HOMER identified the FBE as the most enriched motif in the  
287 top 500 peaks from all datasets, and a preference for RCC was observed in the degenerate  
288 three internal nucleotides, matching the optimal motif (Figure 1D). Second, these target  
289 lists include all expected experimentally validated FBF targets. FBF targets in oogenic  
290 germlines included 13/15 validated FBF targets (*fbf-1*, *fbf-2*, *fem-3*, *fog-1*, *gld-1*, *gld-3*,  
291 *him-3*, *htp-1*, *htp-2*, *syp-2*, *syp-3*, *lip-1*, and *mpk-1*), but were missing the two not  
292 expected: *fog-3* is sperm-specific and therefore not expressed in oogenic germlines (Chen  
293 and Ellis 2000), and *egl-4* has only been established as an FBF target in neurons (Kaye *et al.*  
294 2009) and was not detected in previous genomic analyses of FBF targets (Kershner and  
295 Kimble 2010; Prasad *et al.* 2016). Similarly, FBF targets in spermatogenic germlines  
296 included 14/15 validated targets: all those in oogenic germlines plus *fog-3*. Finally, both  
297 size and complexity of the datasets (File S2) were similar to those for CLIP studies of other  
298 PUFs (Hafner *et al.* 2010; Freeberg *et al.* 2013; Porter *et al.* 2015; Wilinski *et al.* 2015) and  
299 consistent with our previous report on FBF targets in oogenic germlines (Prasad *et al.*  
300 2016). Thus, all target lists include well over a thousand RNAs (Figure 1E).

301 Our modified peak calling method revises FBF-1 and FBF-2 target lists in oogenic  
302 germlines at 20°, but all major conclusions of our previous study (Prasad *et al.* 2016) were  
303 confirmed and revised lists were similar in content. An additional, spermatogenic  
304 germline-specific lincRNA *linc-36* was identified for the first time in this analysis along with  
305 three previously reported lincRNAs (*linc-7*, *linc-4*, and *linc-29*). As in our initial report, the  
306 cell cycle is the most significantly enriched GO term associated with FBF targets in all of  
307 our datasets (File S3). The revised 20° lists contain, respectively, 69% and 84% of FBF-1  
308 and FBF-2 targets reported previously, and the overlap between the FBF-1 and FBF-2 lists  
309 remained similar (68-83% of each paralog’s target list overlapped, File S2, Figure S1C).  
310 Peak heights for FBF-1 and FBF-2 were highly correlated (Pearson R 0.86), similar to that  
311 found previously (Pearson R 0.82) (Prasad *et al.* 2016), confirming the considerable  
312 molecular redundancy of these two nearly identical paralogs. Thus, FBF-1 and FBF-2 bind  
313 to largely the same target RNAs and largely to the same sites within those RNAs, as  
314 concluded previously.



315 As might be expected, temperature affected the FBF binding landscape but many  
316 metrics were comparable: (1) reads-per-gene counts correlated well between  
317 temperatures (Figure 1F, Figure S2, average Spearman rho 0.94 between 25° and 20°  
318 replicates), (2) a variety of additional metrics were similar (File S2), and (3) targets  
319 overlapped heavily (Figure S1D). Figure 1F shows the similarity of reads-per-gene counts  
320 for FBF binding at 25° vs 20° by DESeq2 analysis: the 1% of RNAs that are significant at a  
321  $P < 0.01$  and fold change of  $> 2$  are indicated in red. Our peak caller detected peaks in more  
322 RNAs in the 20° datasets than in the 25° datasets (Figure 1E), because the 20° datasets  
323 have more reads (File S2) and our peak caller has greater sensitivity to detect peaks at  
324 higher read depths, despite the distribution of reads-per-gene being similar (Figure 1F).

325  
326 **Germline gender has a strong influence on the FBF binding landscape.** We first compared  
327 target RNA identities between iCLIP of spermatogenic and oogenic animals, both grown  
328 at 25°. Over half of the FBF target RNAs were shared, but significant fractions were also  
329 found only in one germline gender or the other (Figure 2A). Differences due to germline  
330 gender were thus greater than differences due to temperature (Figure S2, and Figure 2D  
331 compared with Figure 1F). Among the 2114 total FBF targets, 2069 were mRNAs and 45  
332 were non-coding RNAs. For mRNA targets, 1092 were common to both genders (53%),  
333 582 were spermatogenic-specific (28%), and 395 were oogenic-specific (19%); for non-  
334 coding RNA targets, 20 were common (44%), 10 were spermatogenic-specific (22%), and  
335 15 were oogenic-specific (33%).

336 We next gauged differences between spermatogenic and oogenic FBF RNA-binding  
337 profiles quantitatively. If each iCLIP sequencing read were derived from a single FBF-RNA  
338 interaction *in vivo*, then the number of iCLIP reads mapping to a given RNA, as a fraction  
339 of all reads, would serve as an estimate of the frequency of FBF-RNA binding at that RNA  
340 (Porter *et al.* 2015). Based on this reasoning, we assessed FBF-RNA binding frequency at  
341 each target as the number of FBF iCLIP reads (per million) at a given RNA. We then used  
342 Spearman's rank-order correlation coefficients to compare FBF-RNA binding frequencies  
343 across all targets (Figure 2B; Figure S2). Comparisons of the 25° datasets revealed that  
344 FBF-RNA binding frequencies correlated well among spermatogenic replicates (Figure 2B,  
345 mean correlation 0.99) and among oogenic replicates (Figure 2B, mean 0.96), but more  
346 poorly between spermatogenic and oogenic replicates (Figure 2B, mean 0.89, two-tailed  
347  $p$ -value  $10^{-7}$  indicating significant difference in correlation between genders compared to  
348 within genders by  $t$ -test). We broadened this analysis to include FBF binding in oogenic  
349 germlines at 20° with similar results (Figure S2). We conclude that FBF binding frequencies  
350 correlate well for replicates of the same germline gender but are distinct in  
351 spermatogenic and oogenic germlines.

352 One possibility is that gender-specific differences in FBF binding were simply a  
353 reflection of underlying RNA abundances. To investigate this possibility, we assessed the  
354 correlations between spermatogenic/oogenic ratios in FBF binding and  
355 spermatogenic/oogenic ratios in RNA abundance (Figure 2C). RNA abundances were  
356 obtained using RNA-seq data from dissected oogenic and spermatogenic gonads (Ortiz *et al.*  
357 2014). The dashed diagonal line in Figure 2C (slope=1) represents the case in which a  
358 given fold-difference in a transcript's abundance between germlines resulted in the same  
359 fold-difference in FBF binding frequency with that RNA. The dotted horizontal line  
360 (slope=0) represents the case in which FBF binding frequency had no dependence on  
361 germline gender or changes in transcript abundance. The data lies between these  
362 extremes. FBF binding frequencies changed between germline genders, and mostly in the

363 same direction as RNA abundance changes. However, changes in FBF binding frequencies  
364 were not well correlated with changes in RNA abundance (Pearson R 0.64, Spearman  
365 0.69). In other words, FBF-RNA binding frequencies differ markedly between genders, and  
366 do not simply reflect differences in RNA abundance. We conclude that this comparative  
367 analysis identifies gamete-specific and gender-neutral FBF targets that begin to outline  
368 potential subnetworks.

369  
370 **Gamete-specific FBF-RNA complex frequencies reflect gamete-specific programs.** We  
371 asked how the potential FBF subnetworks relate to gamete RNA programs, defined by  
372 RNA-Seq (Noble *et al.* 2016). Briefly, each program includes gamete-specific RNAs plus  
373 gamete-independent RNAs; for example, the full spermatogenic program includes RNAs  
374 expressed only in spermatogenic germlines plus those expressed in germlines making  
375 either gamete. We note the spermatogenic program was obtained from worms with a  
376 *fem-3* gain-of-function allele (to produce adult spermatogenic animals), as in this work.  
377 We asked how FBF-RNA complex frequencies (reads-per-RNA) compare with these  
378 spermatogenic and oogenic RNA programs. Out of the total of 12,839 RNAs expressed in  
379 the germline (Noble *et al.* 2016), 6,873 possessed an average of at least 20 reads per RNA  
380 in FBF iCLIP, and 768 (12%) were bound differentially between the two genders by at least  
381 two-fold ( $p < 0.01$  by DESeq2 (Love *et al.* 2014); Figure 2D; File S4). Figure 2D depicts the  
382 agreement between differentially bound FBF-RNA complex frequencies and gamete  
383 programs: RNAs in the spermatogenic program (blue) separate from RNAs in the oogenic  
384 program (red) when plotted by the ratio of their differential FBF-RNA complex  
385 frequencies. Our results are therefore consistent with previous assignment of RNAs to  
386 gamete programs. Interestingly, 557 out of 768 differentially bound RNAs are enriched in  
387 spermatogenic germlines, indicating that FBF has a more complex interaction network in  
388 spermatogenic germlines than oogenic germlines, as it gains more new RNA targets.

389  
390 **Search for distinct biological roles associated with FBF subnetworks.** We next asked if  
391 gamete-neutral, spermatogenic-specific and oogenic-specific targets were enriched for  
392 either distinct GO terms or germline phenotypes. No striking difference was found (File  
393 S3; Figure 2E). Regardless of germline gender, each group of FBF targets was enriched for  
394 genes with similar GO terms and phenotypes. Thus, these groups could not be linked to  
395 distinct biological roles.

396  
397 **Conservation of PUF targets.** PUF proteins from diverse branches of Eukarya can perform  
398 similar biological functions, including stem cell maintenance (Wickens *et al.* 2002).  
399 Moreover, previous studies revealed that they share some of the same target mRNAs,  
400 including those regulating the cell cycle and programmed cell death (Kershner and Kimble  
401 2010; Prasad *et al.* 2016; Lee *et al.* 2007). To complement those studies with the  
402 expanded and refined FBF target datasets reported in this work, we compared them to  
403 the PUM2 PAR-CLIP dataset, obtained from human embryonic kidney cells (HEK293)  
404 (Hafner *et al.* 2010) and the PUM1 and PUM2 iCLIP data sets, obtained from neonatal  
405 mouse brains (Zhang *et al.* 2017). We collapsed orthologous genes to ortholog groups,  
406 and discarded ortholog groups that did not exist in both humans and worms (see  
407 methods). Comparison with the PUM2 dataset from HEK293 cells showed that 28% of all  
408 ortholog groups were shared with PUM2, while 33-35% of ortholog groups targeted by  
409 FBF were shared with PUM2 (Figure 2F, File S7). More striking, among the FBF targets in  
410 the top 500 peaks, 40-44% were shared (Figure 2F, File S7). FBF targets in spermatogenic

411 and oogenic germlines had similar overlap. By contrast, comparison of FBF targets with  
412 PUM1 and PUM2 targets in mouse neonatal brain were less striking, with an overlap of  
413 15-17% overlap with FBF targets, vs 14% of all ortholog groups (Figure S3, File S7). We  
414 also compared targets of the *C. elegans* RNA-binding protein GLD-1, which controls the  
415 differentiation of germline stem cells, with PUM targets (Jungkamp *et al.* 2011). The GLD-  
416 1 target dataset was smaller than the FBF target dataset, but had a similar overlap with  
417 human targets (Figure 2F), consistent with the overall number of shared targets reflecting  
418 similar molecular and biological functions. For both FBF and GLD-1, target RNAs are more  
419 abundant than the average RNA (Figure S4), and this likely also contributes to a higher  
420 target overlap with PUM2 than with randomly selected worm genes. This delineation of  
421 shared targets provides a resource for further studies.

422  
423 **Clustering FBF-RNA complex frequencies reveals cores of FBF subnetworks.** A common  
424 method in systems biology is to cluster the expression of genes across conditions to reveal  
425 functionally related groups (Eisen *et al.* 1998). Using that logic, we hypothesized that  
426 clustering of the FBF-RNA complex frequencies might also reveal functionally related  
427 groups. We began with our list of 2,114 FBF target RNAs and clustered their FBF binding  
428 frequencies (Figure 3A; File S5) (see Methods). The actual number of RNAs in Figure 3A  
429 and File S5 is 2,111, because our peak caller assigns peaks to the ncRNA if a peak overlaps  
430 both mRNA and ncRNA, while such reads were discarded as ambiguous when counting  
431 reads-per-gene. As a result, three ncRNAs that were assigned peaks were dropped in this  
432 analysis for having no reads-per-gene, resulting in 2,111 RNAs. Clustering revealed four  
433 blocks of interest, numbered in order of increasing spermatogenic to oogenic binding  
434 ratio (Figure 3A, File S6). FBF binds Block I RNAs at high frequency in spermatogenic, but  
435 not oogenic animals (Figure 3A). By contrast, FBF binds Block II and Block III RNAs at high  
436 frequency in both spermatogenic and oogenic animals and hence are gamete-neutral.  
437 Finally, FBF binds a small cluster of RNAs in oogenic but not spermatogenic animals (Block  
438 IV), and we note this group is smaller than the reciprocal spermatogenic Block I.

439  
440 We next compared our results from the heatmap to principle component analysis (PCA,  
441 Figure 3B-C). The first component (x-axis) roughly corresponds to an average binding  
442 frequency across all datasets, and the second component (y-axis) roughly corresponds to  
443 the ratio of spermatogenic vs oogenic binding. As a result, dots at the top of the graph  
444 are in the oogenic program and dots at the bottom are mostly in the spermatogenic  
445 program (Figure 3B). The same clusters observed by clustering the heatmap (Figure 3A)  
446 were visible in the PCA plot (Figure 3C), supporting the validity of our groupings. We note  
447 that the outlier *gld-1*, which is an extremely frequent FBF target, appears as an extreme  
448 example of a Block III RNA in the PCA plot (Fig. 3C), so we added it to Block III.

449  
450 Figure 3D illustrates these clustered blocks of RNAs together with our earlier DESeq2  
451 analysis of FBF-binding. As expected, Block I and Block IV RNAs were differentially bound  
452 in spermatogenic and oogenic animals, respectively (blue and pink dots, Figure 3B), while  
453 Block II (green dots, Figure 3B) and Block III (purple dots, Figure 3D) RNAs were either  
454 gamete-nonspecific or enriched in oogenic germlines. A major difference between Block  
455 II and Block III RNAs was number of reads mapping to the average RNA, which was much  
456 greater for Block III than for Block II (Figure 4A). We conclude that distinct groups of RNAs  
457 emerge by this clustering method. Below we examine each block in turn.

458

459 **Block I RNAs (File S6).** Block I contains 75 RNAs that are enriched in FBF iCLIP from  
460 spermatogenic but not oogenic germlines (Figure 3A). Block I RNAs therefore likely belong  
461 to a spermatogenesis FBF subnetwork. Consistent with that idea, Block I RNAs include the  
462 key sperm fate regulator *fog-3* (Ellis and Kimble 1995), and 70/75 Block I RNAs belong to  
463 the spermatogenic program identified by RNA-seq (Noble *et al.* 2016). However, most  
464 Block I RNAs encode proteins whose functions have not yet been characterized and no  
465 GO terms were enriched (P value<0.01). To pare down Block I RNAs, we applied two  
466 criteria: the highest peak is at least modestly high (25 reads/million) and contains an FBE.  
467 This allowed identification of 29 RNAs (Table 1) that encode a diverse array of proteins,  
468 some with conserved domains, including a phosphatase and five kinases. This is  
469 consistent with FBF serving as a “regulator of regulators” (Kershner and Kimble 2010). We  
470 note Block I also contains a novel lincRNA FBF target, *linc-36*. We conclude that Block I  
471 RNAs belong to the FBF spermatogenesis subnetwork and that 29 RNAs within Block I are  
472 likely to be major FBF targets in that subnetwork.

473  
474 **Block II RNAs (File S6).** Block II contains 510 RNAs, most of which were found in FBF iCLIP  
475 RNAs common to spermatogenic and oogenic germlines (Figure 3A). Importantly, among  
476 target RNAs, Block II RNAs account for half of all FBF iCLIP reads and hence for half of all  
477 FBF interactions (Figure 4B). The Block II cluster includes 10 validated FBF target RNAs  
478 (*fog-1*, *syp-2*, *fem-3*, *gld-3*, *htp-2*, *mpk-1*, *him-3*, *lip-1*, *fbf-1*, and *fbf-2*). Stem cell  
479 maintenance is the major FBF function and this function is not gamete-specific  
480 (Crittenden *et al.* 2002). Consistent with the idea that Block II RNAs might be central to  
481 stem cell maintenance, they include key self-renewal regulators *fbf-1* and *fbf-2*  
482 (Crittenden *et al.* 2002), and are most enriched for the biological process GO terms of cell  
483 cycle (p-value  $10^{-20}$ ), cell division ( $10^{-18}$ ), and mitotic nuclear division ( $10^{-17}$ ), embryo  
484 development ending in birth or egg hatching ( $10^{-53}$ ) and reproduction ( $10^{-27}$ , all GO terms  
485 in File S3). Cell cycle regulation is central to stem cell maintenance (e.g. Orford and  
486 Scadden 2008), and we suggest that Block II is enriched in RNAs belonging to the FBF  
487 subnetwork responsible for stem cell maintenance.

488  
489 **Block III RNAs (Table 2, File S6).** Block III contains 21 RNAs that are common to FBF iCLIP  
490 from spermatogenic and oogenic germlines, similar to Block II RNAs (Figure 3A). Block III  
491 RNAs stand out from Block II RNAs by their much higher frequency of FBF binding (Figure  
492 4A). Because the frequency of RNA-protein complexes is a function of both affinity and  
493 abundance, we expected Block III RNAs to be abundant and to possess canonical FBF  
494 binding sites. Indeed, all Block III RNAs were abundant (Figure S4) and all had at least one  
495 canonical FBE under its highest peak: 15/21 had two or more canonical FBEs under that  
496 peak and 17/21 had an FBE with -1 or -2 C (known to enhance affinity) under that peak.  
497 Therefore, Block III RNAs emerge as exceptionally frequent FBF interactors due to both  
498 RNA abundance and high affinity FBF binding.

499 Block III RNAs also stand out by molecular function. Most striking is that 10/21 encode  
500 RNA regulatory proteins and 6/21 localize to P-granules (Table 2). GO terms (File S3)  
501 included P granule ( $10^{-5}$ ) and negative regulation of translation (<0.01). Block III includes  
502 two previously validated targets, *htp-1* and *gld-1*, the latter of which encodes a STAR RNA  
503 binding protein that localizes to P-granules, functions as a translational repressor and  
504 promotes differentiation (Francis *et al.* 1995; Jan *et al.* 1999; Jones *et al.* 1996). In  
505 addition, 3/22 were protein kinases (Table 2). The association of these molecular  
506 functions with Block III mRNAs, and hence with exceptionally frequent FBF targets,

507 emphasizes the role of FBF as a regulator of other regulators and in particular, a high-level  
508 regulator of other post-transcriptional regulators.

509 Based on various functional studies, 16/21 Block III RNAs are required for  
510 gametogenesis or embryogenesis (Table 2). Roles in oogenesis and embryogenesis are  
511 best documented, perhaps because they have been analyzed more intensively than  
512 spermatogenesis. GO terms for oogenesis and embryo development ending in birth or  
513 egg hatching were both significant ( $p$ -values  $10^{-6}$  and  $<0.01$ , respectively) Remarkably,  
514 6/21 Block III mRNAs affect germ cell apoptosis (Table 2), a homeostatic mechanism  
515 common to worms and mammals, and the GO term apoptotic process was enriched ( $p$ -  
516 value  $<0.01$ ). This finding underscores an earlier finding that FBF regulates MAPK-driven  
517 apoptosis in the germ line (Lee *et al.* 2007), a function conserved with murine PUM1 (Chen  
518 *et al.* 2012). Thus, many Block III RNAs are key regulators of gametogenesis, strengthening  
519 the notion that FBF maintains stem cells by repressing differentiation-promoting mRNAs.  
520 In addition, three Block III mRNAs are likely to regulate niche signaling in addition to  
521 promoting differentiation. The stem cell niche in this system relies on Notch signaling to  
522 maintain stem cells (Kimble and Crittenden 2007). Two Block III mRNAs encode physically  
523 interacting proteins, CAR-1 and CGH-1, that repress Notch signaling (Noble *et al.* 2008). A  
524 third Block III mRNA encodes CPB-3, a predicted binding partner of CGH-1 (Audhya *et al.*  
525 2005; Boag *et al.* 2005). An attractive idea is that FBF represses expression of CAR-1 and  
526 CGH-1 in germline stem cells to enhance niche signaling.

527 We suggest that Block III RNAs also belong to the FBF subnetwork responsible for  
528 stem cell maintenance. Among these mRNAs, FBF appears to promote stem cell self-  
529 renewal in part by enhancing niche signaling and in part by repressing differentiation.

530

531 **Block IV RNAs (File S6).** Block IV contains 24 RNAs and represents RNAs enriched in  
532 oogenic germlines over spermatogenic germlines (Figure 2A). Of the 20/24 Block IV RNAs  
533 categorized by Noble *et al.* (2016), all were in the oogenic program and 18/20 were only  
534 in the oogenic program. Interestingly, Block IV includes the snoRNA *ZK858.10*, which,  
535 being a snoRNA, is not found in Noble *et al.*, but which might still be an authentic part of  
536 the oogenic program. Consistent with oogenesis-related functions, Block IV also includes  
537 RNAs for the yolk receptor RME-2 and the ABC transporter MRP-4, the latter of which is  
538 expressed in oocytes to attract sperm (Kubagawa *et al.* 2006). However, Block IV, like  
539 Block I, includes many uncharacterized genes and no GO terms were enriched. Block IV  
540 likely represents an oogenesis-specific subnetwork.

541

542 **Conservation of Block I-IV PUF targets.** We compared the RNAs in Blocks I-IV with the  
543 PUM2 iCLIP dataset from human embryonic kidney cells, as done for oogenic and  
544 spermatogenic FBF datasets described above (Figure 2F). Most striking was the 60%  
545 overlap of Block III RNAs with PUM2 targets. Block I had the lowest overlap among the  
546 three blocks with only ~10%. Of the 21 high-frequency gender neutral Block III targets,  
547 15/21 had human orthologs and 9 were also targets of human PUM2: *ncl-1/TRIM2*, *ima-*  
548 *3/KPNA1*, *KPNA4*, and *KPNA5* (three orthologous PUM targets), *larp-1/LARP1*, *cgh-*  
549 *1/DDX6*, *gck-1/STK24*, *ifet-1/EIF4ENIF1*, *car-1/LSM14B*, *cpb-3/CPEB2* and *CPEB4*, and *kin-*  
550 *19/CSNK1E*, *CSNK1D* and *CSNK1A1*. 7/9 of these are either RNA-binding proteins (*larp-1*,  
551 *cgh-1*, *car-3*, *ncl-1* and *cpb-3*) or regulate RNA processes (*ima-3*, *ifet-1*), consistent with a  
552 role for PUF proteins as regulators of other RNA regulators.

553

554



555 **Conclusions**

556 Our analyses delineate clusters of FBF-bound RNAs that likely represent FBF subnetworks  
557 for spermatogenic (Block I), oogenic (Block IV), and stem cell (Blocks II and III) functions.  
558 Clearly this is only a first step in understanding the diverse roles of FBF regulation.  
559 Because stem cell regulation is a conserved function of metazoan PUFs and many RNAs  
560 in the FBF stem cell subnetwork are also targets of human PUM2, a next focus should be  
561 to learn whether phylogenetically conserved targets are subject to PUF regulation across  
562 phyla, and if so, how and where they are regulated.

563

564 **ACKNOWLEDGEMENTS**

565 We thank Laura Vanderploeg for assistance with figure preparation, as well as Marie  
566 Adams and staff at the UW Biotechnology Center (UWBTC) for Illumina sequencing. We  
567 thank Anne Helsley-Marchbanks for assistance with preparation of the manuscript. This  
568 work was supported by NIH grants 5T32GM00869217 (AP), 5T32GM08349 (DFP),  
569 GM050942 (MW) and GM069454 (JK). JK is an investigator of the Howard Hughes Medical  
570 Institute.

571



572 **LITERATURE CITED**

- 573 Anders, S., P. T. Pyl, and W. Huber, 2015 HTSeq—a Python framework to work with high-  
574 throughput sequencing data. *Bioinformatics* 31 (2): 166-169.
- 575 Ascano, M., S. Gerstberger, and T. Tuschl, 2013 Multi-disciplinary methods to define RNA-  
576 protein interactions and regulatory networks. *Current Opinion in Genetics &*  
577 *Development* 23 (1): 20-28.
- 578 Audhya, A., F. Hyndman, I. X. McLeod, A. S. Maddox, J. R. Yates, 3rd *et al.*, 2005 A complex  
579 containing the Sm protein CAR-1 and the RNA helicase CGH-1 is required for  
580 embryonic cytokinesis in *Caenorhabditis elegans*. *The Journal of Cell Biology* 171 (2):  
581 267-279.
- 582 Barton, M. K., T. B. Schedl, and J. Kimble, 1987 Gain-of-function mutations of *fem-3*, a sex-  
583 determination gene in *Caenorhabditis elegans*. *Genetics* 115: 107-119.
- 584 Bernstein, D., B. Hook, A. Hajarnavis, L. Opperman, and M. Wickens, 2005 Binding  
585 specificity and mRNA targets of a *C. elegans* PUF protein, FBF-1. *RNA* 11 (4): 447-458.
- 586 Boag, P. R., A. Nakamura, and T. K. Blackwell, 2005 A conserved RNA-protein complex  
587 component involved in physiological germline apoptosis regulation in *C. elegans*.  
588 *Development* 132 (22): 4975-4986.
- 589 Campbell, Z. T., D. Bhimsaria, C. T. Valley, J. A. Rodriguez-Martinez, E. Menichelli *et al.*,  
590 2012 Cooperativity in RNA-protein interactions: global analysis of RNA binding  
591 specificity. *Cell reports* 1 (5): 570-581.
- 592 Chen, D., W. Zheng, A. Lin, K. Uyhazi, H. Zhao *et al.*, 2012 Pumilio 1 suppresses multiple  
593 activators of p53 to safeguard spermatogenesis. *Current Biology* 22 (5): 420-425.
- 594 Chen, P.-J., and R. E. Ellis, 2000 TRA-1A regulates transcription of *fog-3*, which controls  
595 germ cell fate in *C. elegans*. *Development* 127 (14): 3119-3129.
- 596 Crittenden, S. L., D. S. Bernstein, J. L. Bachorik, B. E. Thompson, M. Gallegos *et al.*, 2002 A  
597 conserved RNA-binding protein controls germline stem cells in *Caenorhabditis*  
598 *elegans*. *Nature* 417: 660-663.
- 599 Darnell, R. B., 2013 RNA protein interaction in neurons. *Annual Review of Neuroscience*  
600 36 (1): 243-270.
- 601 Dobin, A., C. A. Davis, F. Schlesinger, J. Drenkow, C. Zaleski *et al.*, 2013 STAR: ultrafast  
602 universal RNA-seq aligner. *Bioinformatics* 29 (1): 15-21.
- 603 Eckmann, C. R., B. Kraemer, M. Wickens, and J. Kimble, 2002 GLD-3, a Bicaudal-C homolog  
604 that inhibits FBF to control germline sex determination in *C. elegans*. *Developmental*  
605 *Cell* 3 (5): 697-710.
- 606 Eisen, M. B., P. T. Spellman, P. O. Brown, and D. Botstein, 1998 Cluster analysis and display  
607 of genome-wide expression patterns. *Proceedings of the National Academy of*  
608 *Sciences of the United States of America* 95 (25): 14863-14868.
- 609 Ellis, R. E., and J. Kimble, 1995 The *fog-3* gene and regulation of cell fate in the germ line  
610 of *Caenorhabditis elegans*. *Genetics* 139: 561-577.
- 611 Follwaczny, P., R. Schieweck, T. Riedemann, A. Demleitner, T. Straub *et al.*, 2017 Pumilio2-  
612 deficient mice show a predisposition for epilepsy. *Disease Models & Mechanisms* 10  
613 (11): 1333-1342.
- 614 Francis, R., M. K. Barton, J. Kimble, and T. Schedl, 1995 *gld-1*, a tumor suppressor gene  
615 required for oocyte development in *Caenorhabditis elegans*. *Genetics* 139 (2): 579-  
616 606.
- 617 Freeberg, M. A., T. Han, J. J. Moresco, A. Kong, Y. C. Yang *et al.*, 2013 Pervasive and  
618 dynamic protein binding sites of the mRNA transcriptome in *Saccharomyces*  
619 *cerevisiae*. *Genome Biology* 14 (2): R13.

- 620 Friend, K., Z. T. Campbell, A. Cooke, P. Kroll-Conner, M. P. Wickens *et al.*, 2012 A conserved  
621 PUF–Ago–eEF1A complex attenuates translation elongation. *Nature Structural &*  
622 *Molecular Biology* 19 (2): 176-183.
- 623 Frøkjær-Jensen, C., M. W. Davis, C. E. Hopkins, B. J. Newman, J. M. Thummel *et al.*, 2008  
624 Single-copy insertion of transgenes in *Caenorhabditis elegans*. *Nature Genetics* 40  
625 (11): 1375-1383.
- 626 Gennarino, V. A., E. E. Palmer, L. M. McDonell, L. Wang, C. J. Adamski *et al.*, 2018 A mild  
627 *PUM1* mutation is associated with adult-onset ataxia, whereas haploinsufficiency  
628 causes developmental delay and seizures. *Cell* 172 (5): 924-936 e911.
- 629 Gerber, A. P., D. Herschlag, and P. O. Brown, 2004 Extensive association of functionally  
630 and cytotopically related mRNAs with Puf family RNA-binding proteins in yeast. *PLoS*  
631 *Biology* 2 (3): E79.
- 632 Hafner, M., M. Landthaler, L. Burger, M. Khorshid, J. Hausser *et al.*, 2010 Transcriptome-  
633 wide identification of RNA-binding protein and microRNA target sites by PAR-CLIP.  
634 *Cell* 141 (1): 129-141.
- 635 Heinz, S., C. Benner, N. Spann, E. Bertolino, Y. C. Lin *et al.*, 2010 Simple combinations of  
636 lineage-determining transcription factors prime cis-regulatory elements required for  
637 macrophage and B cell identities. *Molecular Cell* 38 (4): 576-589.
- 638 Hogan, G. J., P. O. Brown, and D. Herschlag, 2015 Evolutionary conservation and  
639 diversification of Puf RNA binding proteins and their mRNA targets. *PLoS Biology* 13  
640 (11): e1002307.
- 641 Huang, D. W., B. T. Sherman, and R. A. Lempicki, 2009 Systematic and integrative analysis  
642 of large gene lists using DAVID bioinformatics resources. *Nature Protocols* 4 (1): 44-  
643 57.
- 644 Huppertz, I., J. Attig, A. D'Ambrogio, L. E. Easton, C. R. Sibley *et al.*, 2014 iCLIP: protein-  
645 RNA interactions at nucleotide resolution. *Methods* 65 (3): 274-287.
- 646 Ivshina, M., P. Lasko, and J. D. Richter, 2014 Cytoplasmic polyadenylation element binding  
647 proteins in development, health, and disease. *Annual Review of Cell and*  
648 *Developmental Biology* 30: 393-415.
- 649 Jan, E., C. K. Motzny, L. E. Graves, and E. B. Goodwin, 1999 The STAR protein, GLD-1, is a  
650 translational regulator of sexual identity in *Caenorhabditis elegans*. *The EMBO Journal*  
651 18 (1): 258-269.
- 652 Jones, A. R., R. Francis, and T. Schedl, 1996 GLD-1, a cytoplasmic protein essential for  
653 oocyte differentiation, shows stage- and sex-specific expression during  
654 *Caenorhabditis elegans* germline development. *Developmental Biology* 180 (1): 165-  
655 183.
- 656 Jungkamp, A. C., M. Stoeckius, D. Mecnas, D. Grun, G. Mastrobuoni *et al.*, 2011 In vivo  
657 and transcriptome-wide identification of RNA binding protein target sites. *Molecular*  
658 *Cell* 44 (5): 828-840.
- 659 Kassuhn, W., U. Ohler, and P. Drewe, 2016 Cseq-Simulator: A data simulator for CLIP-Seq  
660 experiments. *Pac Symp Biocomput* 21: 433-444.
- 661 Kaye, J. A., N. C. Rose, B. Goldsworthy, A. Goga, and N. D. L'Etoile, 2009 A 3'UTR Pumilio-  
662 binding element directs translational activation in olfactory sensory neurons. *Neuron*  
663 61 (1): 57-70.
- 664 Keene, J. D., 2007 RNA regulons: coordination of post-transcriptional events. *Nature*  
665 *Reviews: Genetics* 8 (7): 533-543.

- 666 Kershner, A. M., and J. Kimble, 2010 Genome-wide analysis of mRNA targets for  
667 *Caenorhabditis elegans* FBF, a conserved stem cell regulator. *Proceedings of the*  
668 *National Academy of Sciences of the United States of America* 107 (8): 3936-3941.
- 669 Kimble, J., and S. L. Crittenden, 2007 Controls of germline stem cells, entry into meiosis,  
670 and the sperm/oocyte decision in *Caenorhabditis elegans*. *Annual Review of Cell and*  
671 *Developmental Biology* 23: 405-433.
- 672 Kraemer, B., S. Crittenden, M. Gallegos, G. Moulder, R. Barstead *et al.*, 1999 NANOS-3 and  
673 FBF proteins physically interact to control the sperm-oocyte switch in *Caenorhabditis*  
674 *elegans*. *Current Biology* 9 (18): 1009-1018.
- 675 Kubagawa, H. M., J. L. Watts, C. Corrigan, J. W. Edmonds, E. Sztul *et al.*, 2006 Oocyte  
676 signals derived from polyunsaturated fatty acids control sperm recruitment *in vivo*.  
677 *Nature Cell Biology* 8 (10): 1143-1148.
- 678 Lander, A. D., J. Kimble, H. Clevers, E. Fuchs, D. Montarras *et al.*, 2012 What does the  
679 concept of the stem cell niche really mean today? *BMC Biology* 10: 19.
- 680 Lee, C. D., and B. P. Tu, 2015 Glucose-regulated phosphorylation of the PUF protein Puf3  
681 regulates the translational fate of its bound mRNAs and association with RNA  
682 granules. *Cell reports* 11 (10): 1638-1650.
- 683 Lee, M.-H., B. Hook, G. Pan, A. M. Kershner, C. Merritt *et al.*, 2007 Conserved regulation  
684 of MAP kinase expression by PUF RNA-binding proteins. *PLoS Genetics* 3 (12): e233.
- 685 Lin, H., and A. C. Spradling, 1997 A novel group of *pumilio* mutations affects the  
686 asymmetric division of germline stem cells in the *Drosophila* ovary. *Development* 124  
687 (12): 2463-2476.
- 688 Love, M. I., W. Huber, and S. Anders, 2014 Moderated estimation of fold change and  
689 dispersion for RNA-seq data with DESeq2. *Genome Biology* 15 (12): 550.
- 690 Luitjens, C., M. Gallegos, B. Kraemer, J. Kimble, and M. Wickens, 2000 CPEB proteins  
691 control two key steps in spermatogenesis in *C. elegans*. *Genes & Development* 14 (20):  
692 2596-2609.
- 693 Merritt, C., D. Rasoloson, D. Ko, and G. Seydoux, 2008 3' UTRs are the primary regulators  
694 of gene expression in the *C. elegans* germline. *Current Biology* 18 (19): 1476-1482.
- 695 Noble, D. C., S. T. Aoki, M. A. Ortiz, K. W. Kim, J. M. Verheyden *et al.*, 2016 Genomic  
696 analyses of sperm fate regulator targets reveal a common set of oogenic mRNAs in  
697 *Caenorhabditis elegans*. *Genetics* 202 (1): 221-234.
- 698 Noble, S. L., B. L. Allen, L. K. Goh, K. Nordick, and T. C. Evans, 2008 Maternal mRNAs are  
699 regulated by diverse P body-related mRNP granules during early *Caenorhabditis*  
700 *elegans* development. *The Journal of Cell Biology* 182 (3): 559-572.
- 701 Opperman, L., B. Hook, M. DeFino, D. S. Bernstein, and M. Wickens, 2005 A single spacer  
702 nucleotide determines the specificities of two mRNA regulatory proteins. *Nature*  
703 *Structural & Molecular Biology* 12 (11): 945-951.
- 704 Orford, K. W., and D. T. Scadden, 2008 Deconstructing stem cell self-renewal: genetic  
705 insights into cell-cycle regulation. *Nature Reviews: Genetics* 9 (2): 115-128.
- 706 Ortiz, M. A., D. Noble, E. P. Sorokin, and J. Kimble, 2014 A new dataset of spermatogenic  
707 vs. oogenic transcriptomes in the nematode *Caenorhabditis elegans*. *G3* 4 (9): 1765-  
708 1772.
- 709 Porter, D. F., Y. Y. Koh, B. VanVeller, R. T. Raines, and M. Wickens, 2015 Target selection  
710 by natural and redesigned PUF proteins. *Proceedings of the National Academy of*  
711 *Sciences* 112 (52): 15868-15873.
- 712 Prasad, A., D. F. Porter, P. L. Kroll-Conner, I. Mohanty, A. R. Ryan *et al.*, 2016 The PUF  
713 binding landscape in metazoan germ cells. *RNA* 22 (7): 1026-1043.

- 714 Qiu, C., A. Kershner, Y. Wang, C. P. Holley, D. Wilinski *et al.*, 2012 Divergence of  
715 Pumilio/*fem-3* mRNA binding factor (PUF) protein specificity through variations in an  
716 RNA-binding pocket. *The Journal of Biological Chemistry* 287 (9): 6949-6957.
- 717 Salvetti, A., L. Rossi, A. Lena, R. Batistoni, P. Deri *et al.*, 2005 *DjPum*, a homologue of  
718 *Drosophila Pumilio*, is essential to planarian stem cell maintenance. *Development* 132  
719 (8): 1863-1874.
- 720 Shaye, D. D., and I. Greenwald, 2011 OrthoList: a compendium of *C. elegans* genes with  
721 human orthologs. *PLoS one* 6 (5): e20085.
- 722 Shin, H., K. A. Haupt, A. M. Kershner, P. Kroll-Conner, M. Wickens *et al.*, 2017 SYGL-1 and  
723 LST-1 link niche signaling to PUF RNA repression for stem cell maintenance in  
724 *Caenorhabditis elegans*. *PLoS Genetics* 13 (12): e1007121.
- 725 Sokal, R. R., and C. D. Michener, 1958 A statistical method for evaluating systematic  
726 relationships. *The University of Kansas Science Bulletin* 38 (Pt. 2): 1409-1438.
- 727 Spassov, D. S., 2004 The role of Pumilio genes in maintenance and self-renewal of  
728 hematopoietic stem cells and progenitors. University of Miami, Microbiology and  
729 Immunology. *Dissertations from ProQuest*. 2089.
- 730 Spradling, A., D. Drummond-Barbosa, and T. Kai, 2001 Stem cells find their niche. *Nature*  
731 414: 98-104.
- 732 Suh, N., S. L. Crittenden, A. C. Goldstrohm, B. Hook, B. Thompson *et al.*, 2009 FBF and its  
733 dual control of *gld-1* expression in the *Caenorhabditis elegans* germline. *Genetics* 181  
734 (4): 1249-1260.
- 735 Ule, J., and R. B. Darnell, 2006 RNA binding proteins and the regulation of neuronal  
736 synaptic plasticity. *Curr Opin Neurobiol* 16 (1): 102-110.
- 737 Vessey, J. P., L. Schoderboeck, E. Gingl, E. Luzi, J. Riefler *et al.*, 2010 Mammalian Pumilio  
738 2 regulates dendrite morphogenesis and synaptic function. *Proceedings of the*  
739 *National Academy of Sciences of the United States of America* 107 (7): 3222-3227.
- 740 Wang, X., J. McLachlan, P. D. Zamore, and T. M. T. Hall, 2002 Modular recognition of RNA  
741 by a human Pumilio-homology domain. *Cell* 110 (4): 501-512.
- 742 Wang, X., P. D. Zamore, and T. M. T. Hall, 2001 Crystal structure of a Pumilio homology  
743 domain. *Molecular Cell* 7 (4): 855-865.
- 744 Wang, Y., L. Opperman, M. Wickens, and T. M. Hall, 2009 Structural basis for specific  
745 recognition of multiple mRNA targets by a PUF regulatory protein. *Proceedings of the*  
746 *National Academy of Sciences of the United States of America* 106 (48): 20186-20191.
- 747 Weyn-Vanhentenryck, S. M., A. Mele, Q. Yan, S. Sun, N. Farny *et al.*, 2014 HITS-CLIP and  
748 integrative modeling define the Rbfox splicing-regulatory network linked to brain  
749 development and autism. *Cell reports* 6 (6): 1139-1152.
- 750 Wickens, M., D. S. Bernstein, J. Kimble, and R. Parker, 2002 A PUF family portrait: 3'UTR  
751 regulation as a way of life. *Trends in Genetics* 18 (3): 150-157.
- 752 Wilinski, D., C. Qiu, C. P. Lapointe, M. Nevil, Z. T. Campbell *et al.*, 2015 RNA regulatory  
753 networks diversified through curvature of the PUF protein scaffold. *Nat Commun* 6:  
754 8213.
- 755 Zanetti, S., S. Grinschgl, M. Meola, M. Belfiore, S. Rey *et al.*, 2012 The sperm-oocyte switch  
756 in the *C. elegans* hermaphrodite is controlled through steady-state levels of the *fem-3*  
757 mRNA. *RNA* 18 (7): 1385-1394.
- 758 Zhang, B., M. Gallegos, A. Puoti, E. Durkin, S. Fields *et al.*, 1997 A conserved RNA-binding  
759 protein that regulates sexual fates in the *C. elegans* hermaphrodite germ line. *Nature*  
760 390 (6659): 477-484.

761 Zhang, M., D. Chen, J. Xia, W. Han, X. Cui *et al.*, 2017 Post-transcriptional regulation of  
762 mouse neurogenesis by Pumilio proteins. *Genes & Development* 31 (13): 1354-1369.  
763 Zhu, D., C. R. Stumpf, J. M. Krahn, M. Wickens, and T. M. Hall, 2009 A 5' cytosine binding  
764 pocket in Puf3p specifies regulation of mitochondrial mRNAs. *Proceedings of the*  
765 *National Academy of Sciences of the United States of America* 106 (48): 20192-20197.  
766  
767



768 **Figure captions**

769 **Figure 1** (A) Diagrams of adult XX hermaphrodites making only oocytes (left) or only  
770 sperm (right), but with hermaphroditic somatic tissues. Somatic tissues, grey; oogenic  
771 germline, rose; spermatogenic germline, blue. Germline stem cells (yellow) exist in both  
772 oogenic and spermatogenic germlines, and are maintained by signaling from their niche  
773 (orange). (B) FBF iCLIP datasets analyzed in this work. (C) Percentage of peaks containing  
774 a canonical FBE (UGUNNNAU) in FBF iCLIP datasets. oo, iCLIP from oogenic worms; sp,  
775 iCLIP from spermatogenic worms; 20° or 25°, temperature at which worms were raised.  
776 For each dataset, we scored all peaks (bars marked “total”) as well as the top 500 peaks  
777 (bars marked “top 500”). (D) For each dataset, the canonical FBE was the most significant  
778 motif in the top 500 FBF peaks, according to HOMER. (E) Number of distinct FBF target  
779 RNAs identified for indicated datasets. (F) Few RNAs are differentially bound by FBF  
780 between oogenic worms raised at 25° and 20°, as judged by DESeq2 analysis of reads-per-  
781 gene for 5,768 genes with an average of least 20 reads in oogenic FBF iCLIP and which are  
782 expressed in the germline (Noble *et al.* 2016). The x-axis denotes the fold change of FBF  
783 binding (reads-per-gene) in 25° worms over 20° worms, while the y-axis denotes the  
784 statistical significance of differential binding. The dashed line indicates a P value of 0.01.  
785 Red dots are the 1% (54) of genes with >2 fold change and P value < 0.01.

786  
787 **Figure 2** Comparisons of FBF target RNAs in spermatogenic and oogenic germlines. (A)  
788 Comparison of FBF targets in spermatogenic (blue) and oogenic animals (pink), both  
789 raised at 25°. The 1,112 common, 592 spermatogenic and 410 oogenic represent a first  
790 glimpse of potential FBF subnetworks. (B) Spearman correlations between iCLIP replicates  
791 (R) reinforce the conclusion that FBF has distinct binding landscapes in spermatogenic and  
792 oogenic germlines. Numbers represent rho values for the Spearman correlation between  
793 replicates. The oogenic FBF replicate R1 was of lower complexity than the others, which  
794 likely explains its lower correlations. (C) Spermatogenic/oogenic ratios of FBF binding (y-  
795 axis) to spermatogenic/oogenic ratios of RNA abundance (x-axis). Each dot represents an  
796 RNA: pink dots, oocyte-specific RNAs, blue dots, spermatogenic specific RNAs, and grey  
797 dots, RNA present in both genders, with germline gender-specificity assigned according  
798 to (Noble *et al.* 2016). Dots represent all RNAs with at least one read in any of our  
799 datasets, and present in the spermatogenic or oogenic RNA program (Noble *et al.* 2016).  
800 Diagonal dashed line, a perfect correlation with slope 1; horizontal dotted line, no  
801 correlation. (D) Differences in FBF binding between spermatogenic and oogenic  
802 germlines. Color coding of pink, blue and grey is same as in panel (C). 12% of RNAs change  
803 binding-frequency significantly ( $p < 0.05$ , 2-fold) between genders, most of which are  
804 enriched in spermatogenic germlines (right arm of volcano plot has more dots than left  
805 arm). For ease of viewing, this plot cuts out the few RNAs with extreme p-values, which  
806 extend to  $10^{-89}$  for spermatogenesis-enriched FBF targets and to  $10^{-94}$  for oogenesis-  
807 enriched FBF targets. (E) Enrichment of RNAi phenotypes in indicated groups of RNAs, as  
808 measured by significance (Fisher’s exact test). From the WormBase database, the RNAi  
809 phenotype labels are described as follows: *Diplotene progression during oogenesis variant*  
810 = developing oocytes are defective during the diplotene stage of meiosis; *Germ cell*  
811 *compartment size variant* = change in germ cell compartment size; *Pronuclear size*  
812 *defective early emb* = size change in pronucleus within gametes or early zygote; *High*  
813 *incidence male progeny* = Higher frequency of male progeny than wild-type; *Embryonic*  
814 *lethal* = progeny die as embryos; *Multiple nuclei early emb* = inviable embryos with more  
815 than one nucleus per cell. (F) Overlaps of FBF iCLIP targets with human PUM2 PAR-CLIP



816 targets from human embryonic kidney cells (Hafner *et al.* 2010). The number of ortholog  
817 groups comprising the overlap is indicated as “n=”. See text and methods for further  
818 explanation. For comparison, the overlap with targets of the germline cell fate regulator  
819 GLD-1 (Jungkamp *et al.* 2011) are also given.

820

821 **Figure 3** Clustering FBF-RNA complex frequencies reveals four RNA blocks. (A) Columns  
822 represent FBF iCLIP samples, as indicated at *top*. Rows represent the 2,114 total RNAs  
823 with a significant peak in either of the combined 25° FBF iCLIP datasets. RNAs (rows) were  
824 clustered by Euclidean distance and simple hierarchical clustering. Colors represent the  
825 log<sub>2</sub> reads per gene in the given sample (per million reads), after subtracting the negative  
826 control. RNA blocks are indicated with Roman numerals. Block I RNAs are enriched in  
827 spermatogenic datasets. Block II RNAs are frequently bound and include most  
828 established, positive control targets. Block III RNAs are bound at particularly high  
829 frequency across all samples. Block IV RNAs are enriched in oogenic datasets. Key  
830 examples for each block are noted on left at their approximate location in the y-axis of  
831 the heatmap. All positive control RNAs fell into a block except *syp-3*. (B) Principle  
832 component analysis of the same FBF-RNA complex frequencies as panel (A) shows RNAs  
833 separated by SP/OO ratio (y-axis) and overall FBF-RNA binding frequency (x-axis). RNAs  
834 are colored by whether they are only in the oogenic program (pink), only in the  
835 spermatogenic program (blue), or in both (grey). A very frequent FBF target RNA across  
836 all conditions, *gld-1*, is labeled. (C) The blocks identified in panel (A) are again clustered  
837 by PCA, as in (B), but here RNAs are colored by block rather than program. (D) Volcano  
838 plot of RNAs from Figure 2D, but color coded by block.

839

840 **Figure 4** Block RNAs analyzed by germline gender. (A) Percentage of reads mapping to  
841 block RNAs. Blue boxplots, reads in spermatogenic animals; pink boxplots, reads in  
842 oogenic animals. (B) Percentage of reads in target RNAs from iCLIP in either gender  
843 mapping to the indicated block. Thus, roughly 50% of reads in all target RNAs belong to  
844 Block II RNAs. The 21 Block III RNAs account for roughly 10% of FBF interactions with  
845 target RNAs. Blue bars indicate reads from FBF iCLIP in spermatogenic animals, and pink  
846 bars indicate reads from FBF iCLIP in oogenic animals.

847

848

849 **Supplemental figure captions**

850 **Figure S1.** Venn diagrams of FBF-1 and FBF-2 RNA targets determined by iCLIP under  
851 different conditions. The two FBF proteins bind many RNAs in common, but also have  
852 individual targets. Numbers refer to the number of RNAs identified as FBF targets by iCLIP.  
853 (A) FBF iCLIP in oogenic worms raised at 25°. (B) FBF iCLIP in spermatogenic worms raised  
854 at 25°. (C) FBF iCLIP in oogenic worms raised at 20°. (D) FBF-1 and FBF-2 combined (“FBF  
855 25°”) targets from oogenic worms raised at 25° compared to individually determined FBF-  
856 1 and FBF-2 targets from oogenic worms raised at 20°. The combined FBF-1 and FBF-2  
857 (25°) target list overlaps equally well with the individual FBF-1 and FBF-2 (20°) target lists.  
858 This indicates that the combined FBF-1 and FBF-2 target set represents an average of FBF-  
859 1 and FBF-2.

860  
861 **Figure S2.** Spearman correlations between all iCLIP replicates (R) reinforce the conclusion  
862 that FBF has distinct binding landscapes in spermatogenic and oogenic germlines.  
863 Numbers represent rho values for the Spearman correlation between three replicates (R1  
864 – R3) of iCLIP reads mapping to every target RNA. Target RNAs are defined as the 3,478  
865 RNAs possessing a significant peak in any of the FBF iCLIP replicates. We used all RNAs  
866 identified as targets in any experiment to include all possibly relevant RNAs. Reads per  
867 gene were normalized to dataset size. 25° replicates represent combined FBF-1 and FBF-  
868 2 replicates (see Materials and Methods). The 25° oogenic FBF replicate (R1) was of lower  
869 complexity than the others, which likely explains its lower correlations overall.

870  
871 **Figure S3.** Overlaps of FBF iCLIP targets with human PUM1 and PUM2 iCLIP targets from  
872 murine neonatal brain (Zhang *et al.* 2017). As in Figure 2F, the number of ortholog groups  
873 comprising the overlap is indicated as “n=”. Overlap between GLD-1 targets of (Jungkamp  
874 *et al.* 2011) and PUM2 targets (Zhang *et al.* 2017) are included for comparison.

875  
876  
877 **Figure S4.** Top FBF targets are relatively abundant. The x-axis represents RNA abundance  
878 in  $\log_{10}$  RPKM values for oogenic adult hermaphrodite gonads (Ortiz *et al.* 2014). On the  
879 y-axis, from top to bottom are: all RNAs present in the oogenic program (Noble *et al.*  
880 2016), all targets of FBF in oogenic germlines (25°), the top 100 (by peak height) targets  
881 of oogenic (25°) FBF, and Blocks I-IV from Fig 3. The violin plot represents a Gaussian  
882 kernel density estimate fit to the data. An interior boxplot is also plotted: the white dot  
883 represents the median of the distribution, and the box indicates quartiles.

884  
885

886 **Supplementary Files**

887 **File S1.** Peaks called after FBF iCLIP from oogenic (oo) or spermatogenic (sp) animals at  
888 either 25° or 20°. Each tab label indicates germline gender, temperature and which FBF  
889 paralog was used for iCLIP. For the 25° datasets, FBF-1 and FBF-2 peaks are listed  
890 separately and shown as a combined list termed “FBF”, as described in Materials and  
891 Methods.

892

893 **File S2.** Metrics for FBF iCLIP peaks. Percentages of peaks with a canonical FBE are  
894 provided for both the total list and for the top 500 peaks, as defined in File S1 under the  
895 column labeled “Rank” (column “A”).

896

897 **File S3.** GO terms for FBF targets from all datasets, as well as Blocks II and III. Terms were  
898 identified using DAVID (Huang *et al.* 2009), and, except for Blocks I-IV, only the top 500  
899 ranking RNAs in each dataset were included. The “Benjamini” column denotes the  
900 Benjamini-adjusted p value output by DAVID. There were no significant GO terms (p value  
901 < 0.01) for Block I or IV.

902  
903 **File S4.** Genes significantly differing between spermatogenic and oogenic (both at 25°)  
904 iCLIP by DESeq2. Tab 1: Genes 2-fold enriched in spermatogenic iCLIP at P < 0.01. Tab 2:  
905 Genes 2-fold enriched in oogenic iCLIP at P < 0.01. Tab 3: all DESeq2 results.

906  
907 **File S5.** FBF binding per gene for 2,114 FBF target RNAs. This dataset corresponds to Figure  
908 3A.

909  
910 **File S6.** Blocks, as defined in Figure 3.

911  
912 **File S7.** FBF targets overlapping with the human PUF protein PUM2 identified by PAR-CLIP  
913 in HEK293 cells (Hafner *et al.* 2010). Tab names correspond to peak lists in File S1 or the  
914 blocks in File S6, except the “Common” tab corresponds to targets shared by FBF in both  
915 spermatogenic and oogenic germlines. Tabs labeled “top 500” only include the top 500  
916 FBF targets in their respective list, ranked by frequency (read count). Worm locus IDs and  
917 gene names correspond to FBF targets. All human ortholog Ensembl IDs are given for each  
918 RNA, regardless of whether they are targeted by PUM2. The “PUM2 target HGNC symbol”  
919 column denotes orthologous PUM2 targets.

920

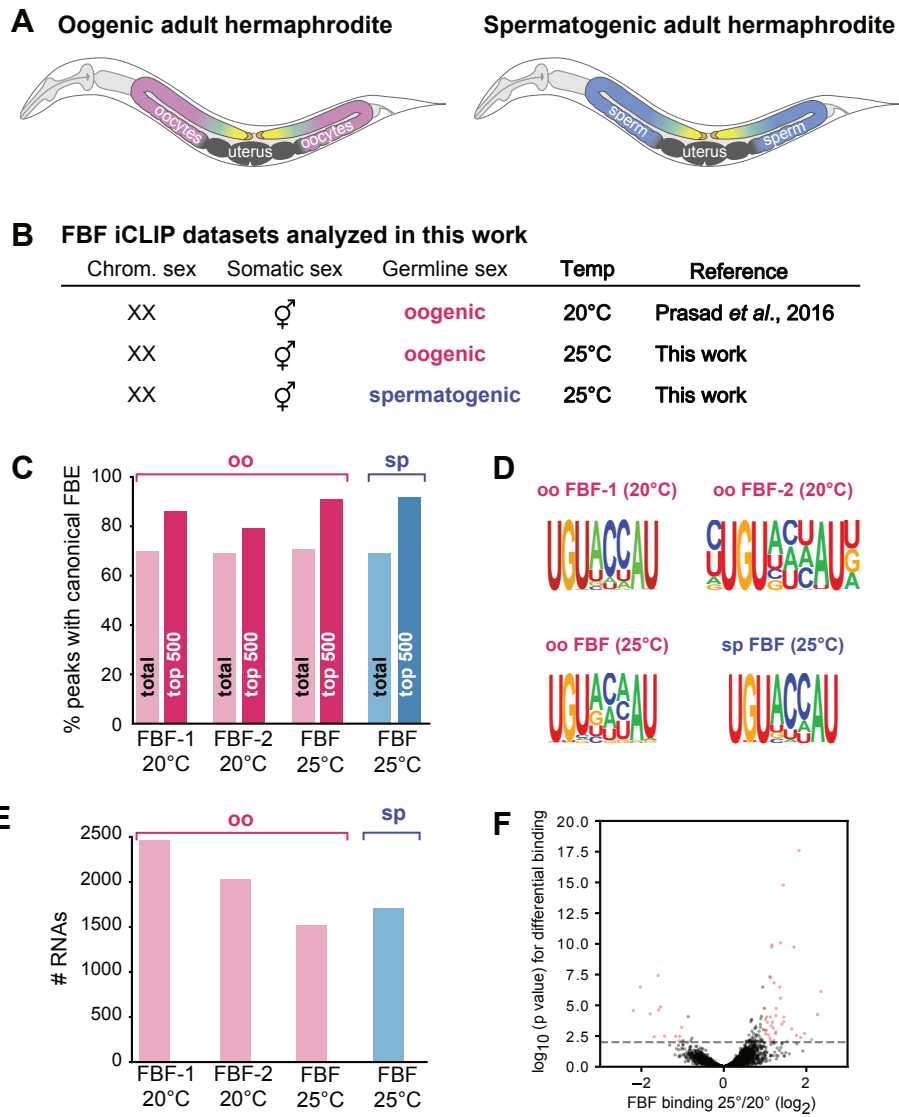

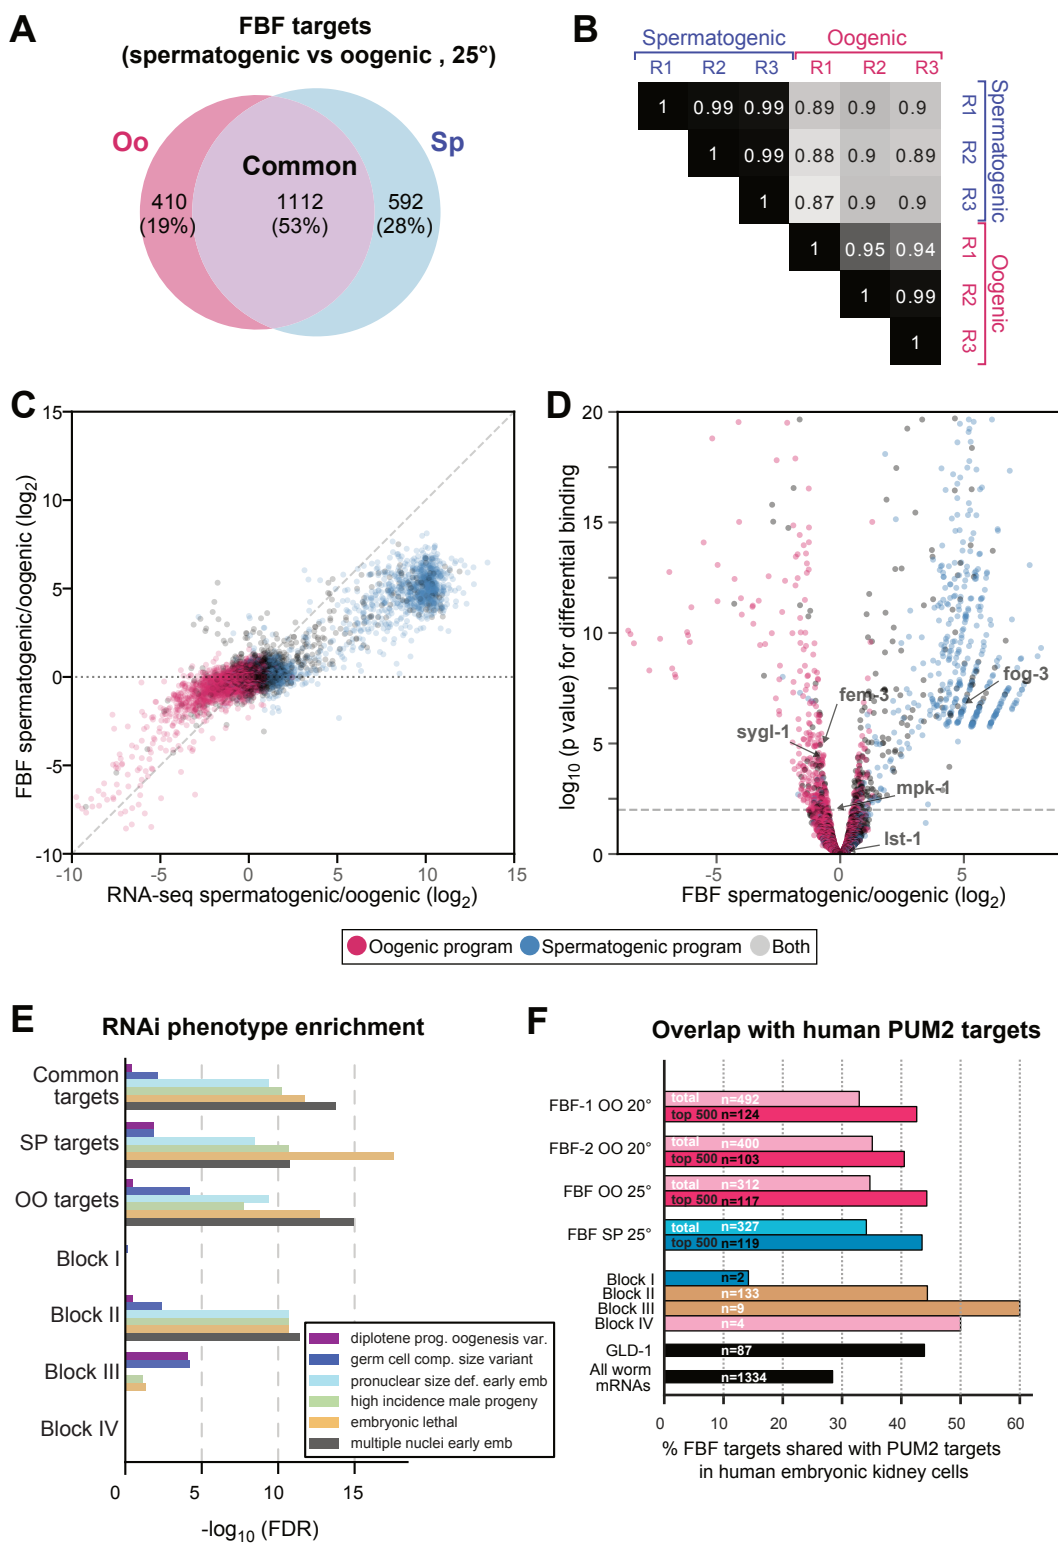

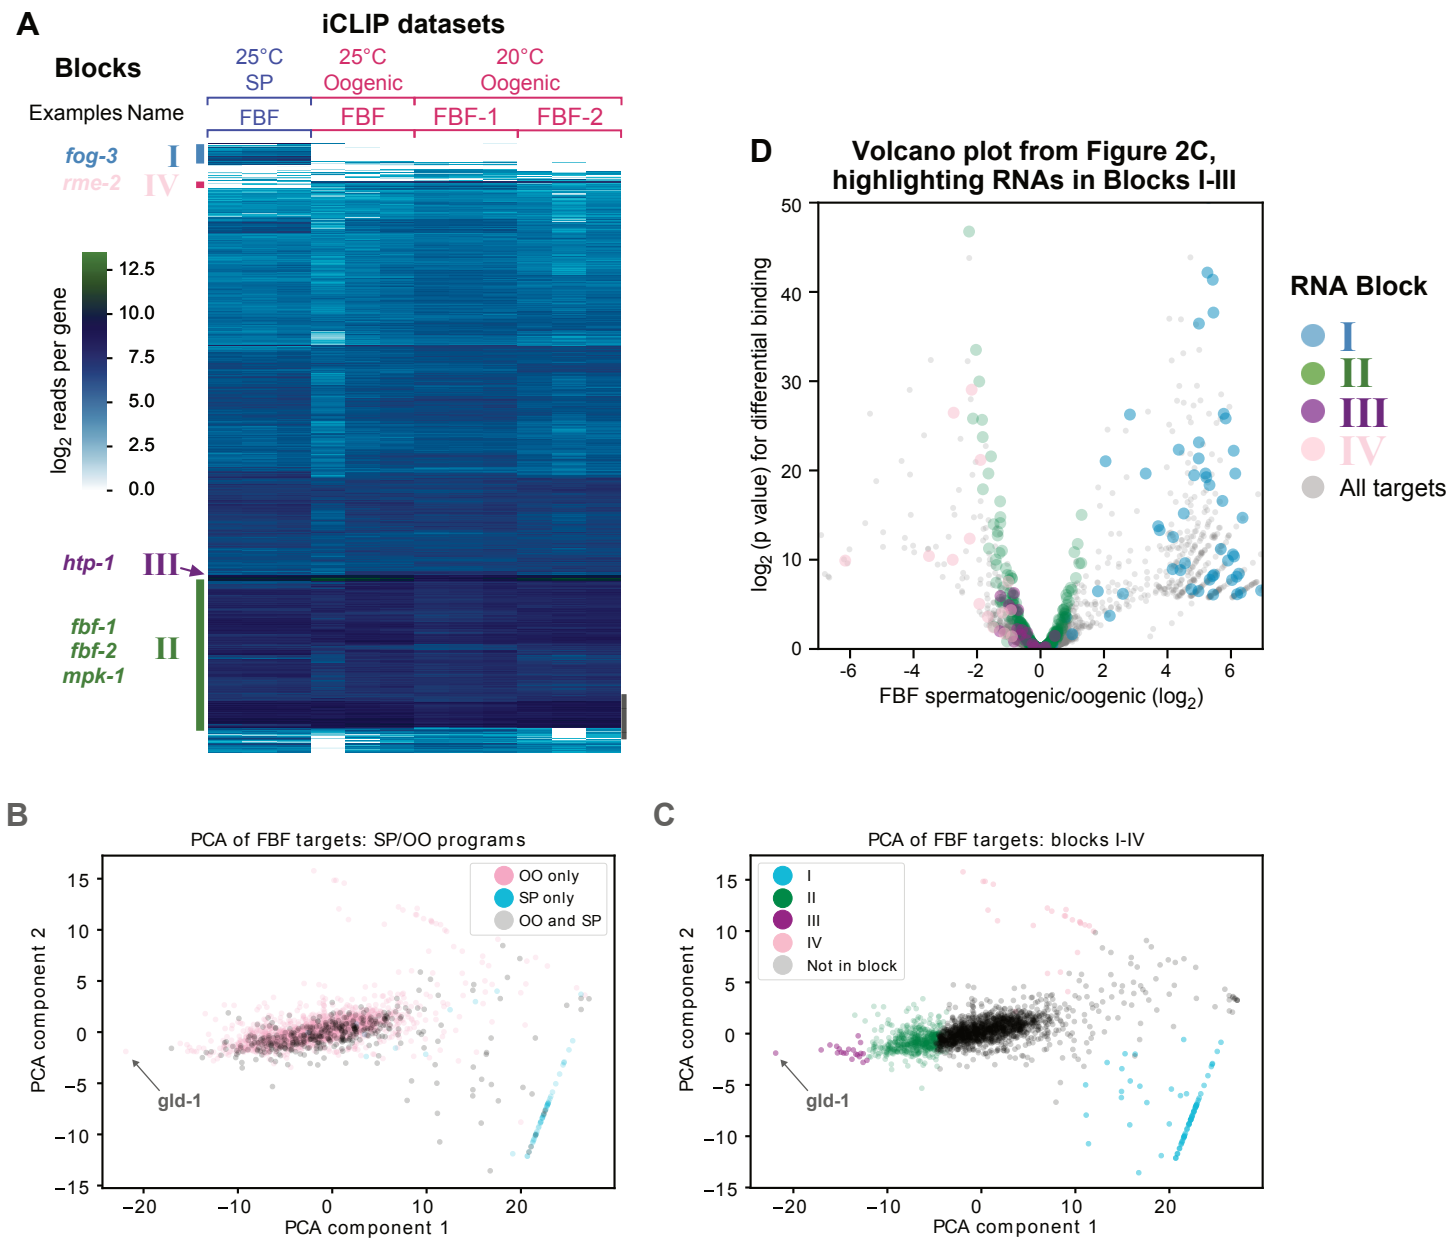



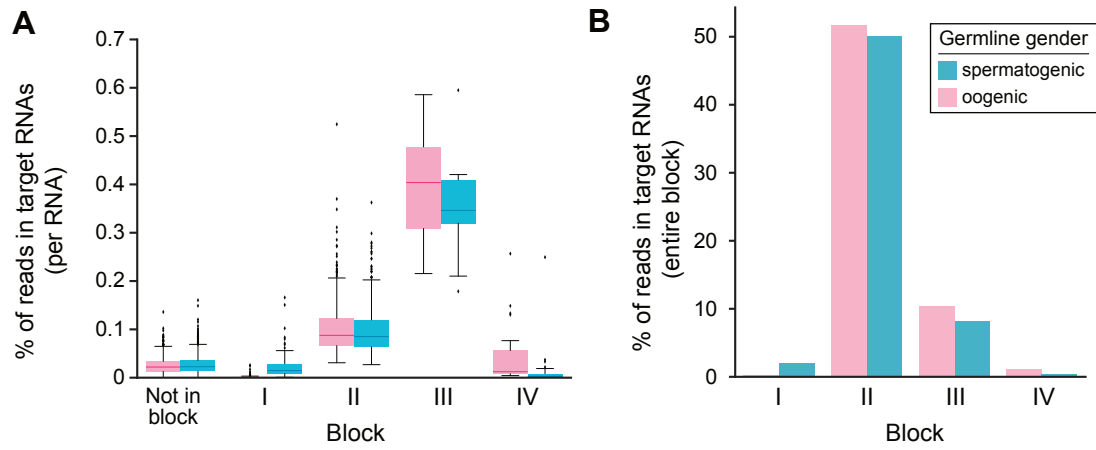

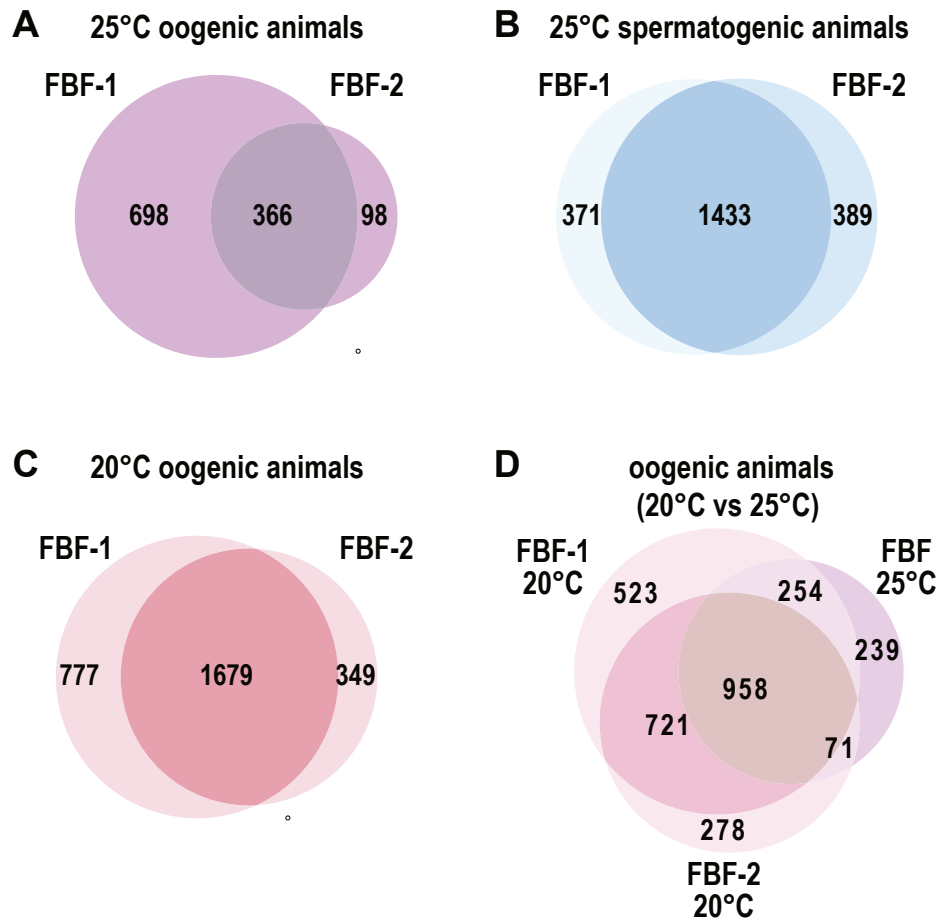



Porter, Prasad *et al.*  
Supplementary Figure 3

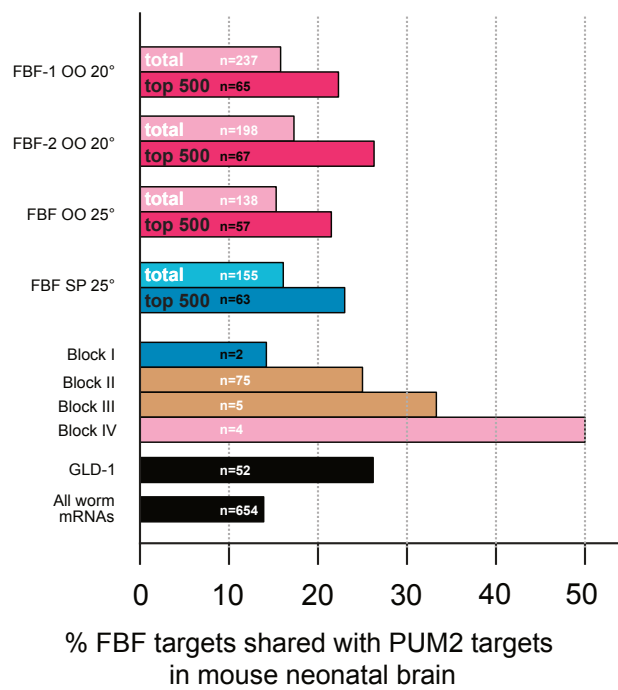

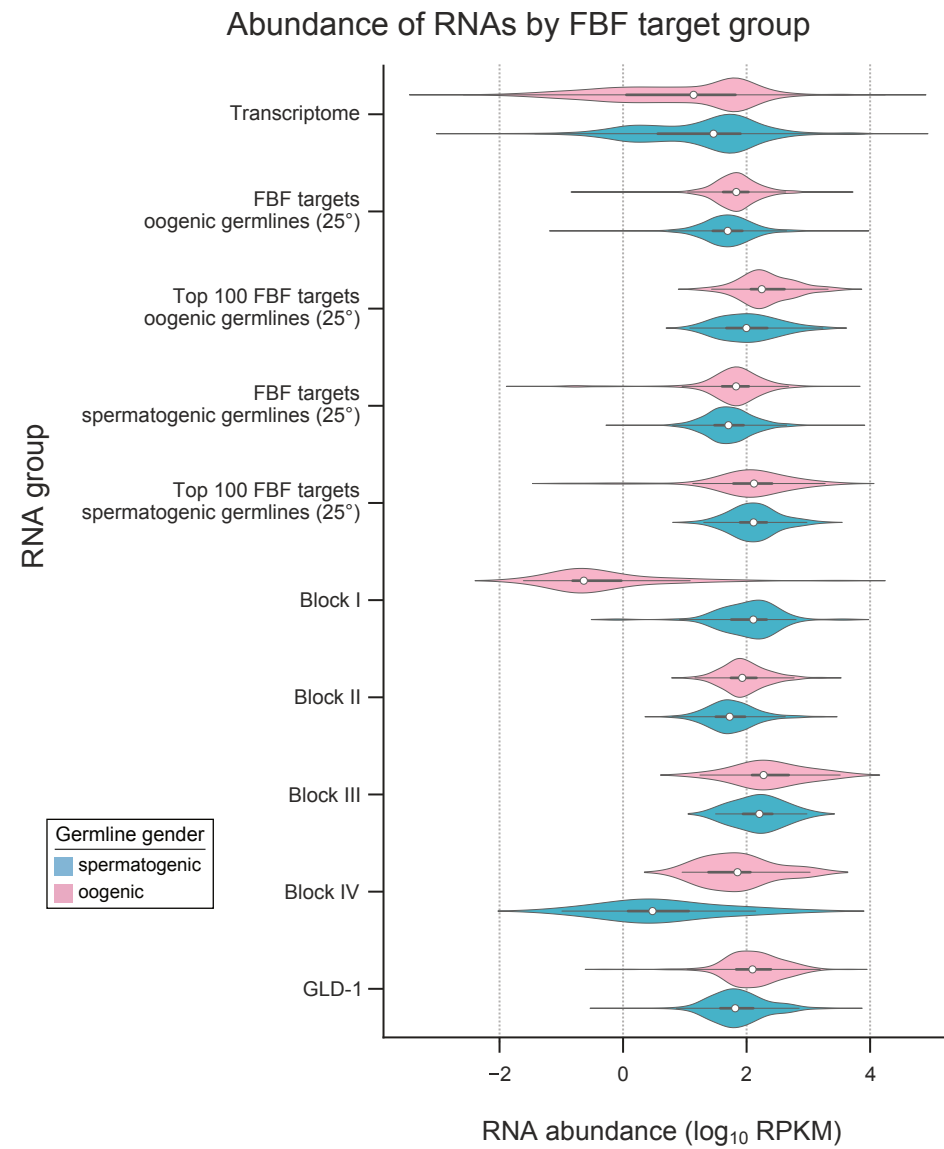

**Table 1. Major spermatogenesis-specific FBF targets, from Block I**

|    | <b>RNA</b>     | <b>Biochemical function<sup>a</sup></b>         | <b>Biological function<sup>b</sup></b> | <b>References</b>                                         |
|----|----------------|-------------------------------------------------|----------------------------------------|-----------------------------------------------------------|
| 1  | <i>fog-3</i>   | Tob/BTG RNA regulator                           | Sperm fate specification               | Ellis and Kimble (1995)                                   |
| 2  | F58F12.2       | Predicted transmembrane protein                 | Unknown                                | Krogh <i>et al.</i> (2001); Petersen <i>et al.</i> (2011) |
| 3  | <i>gska-3</i>  | MOK protein kinase                              | Development                            | Mulder <i>et al.</i> (2003)                               |
| 4  | W02B12.12      | Testis-specific serine/threonine-protein kinase | Unknown                                | WormBase                                                  |
| 5  | C56G2.5        | Kinase                                          | Unknown                                | WormBase                                                  |
| 6  | ZK622.1        | FER tyrosine kinase (non-receptor)              | Unknown                                | WormBase                                                  |
| 7  | C35E7.10       | FER tyrosine kinase (non-receptor)              | Viability                              | WormBase                                                  |
| 8  | <i>moa-1</i>   | Tyrosine phosphatase                            | Unknown                                | Ewald <i>et al.</i> (2012)                                |
| 9  | <i>osta-1</i>  | Solute carrier family 51, alpha subunit         | Cilia morphology                       | Olivier-Mason <i>et al.</i> (2013)                        |
| 10 | <i>glo-4</i>   | Guanine nucleotide exchange factor              | Viability                              | Hermann <i>et al.</i> (2005)                              |
| 11 | Y57G11A.2      | Vitelline membrane outer layer protein          | Unknown                                | WormBase                                                  |
| 12 | <i>snp-1.3</i> | Ortholog of human SNAPC1                        | Unknown                                | WormBase                                                  |
| 13 | ZK973.8        | BTB/POZ domain protein                          | Neural development                     | WormBase                                                  |
| 14 | F27C8.5        | BTB/POZ domain protein                          | Unknown                                | Mulder <i>et al.</i> (2003)                               |
| 15 | <i>linc-36</i> | lincRNA                                         | Unknown                                | WormBase                                                  |
| 16 | <i>glct-6</i>  | Glucuronyltransferase                           | Life span                              | Kim and Sun (2007)                                        |
| 17 | <i>pitr-5</i>  | Phosphate transporter                           | Unknown                                | WormBase                                                  |
| 18 | ZK686.5        | C2H2-like zinc finger                           | Unknown                                | WormBase                                                  |
| 19 | C42C1.3        | Novel <sup>c</sup>                              | Fertility                              | Sun <i>et al.</i> (2011)                                  |
| 20 | D1081.12       | Novel <sup>c</sup>                              | Unknown                                | WormBase                                                  |
| 21 | C06C3.10       | Novel <sup>c</sup>                              | Unknown                                | WormBase                                                  |
| 22 | <i>ttr-9</i>   | Transthyretin-like protein <sup>c</sup>         | Unknown                                | WormBase                                                  |
| 23 | ZK637.12       | Novel                                           | Unknown                                | WormBase                                                  |
| 24 | C35A11.2       | Novel, with signal peptide                      | Unknown                                | WormBase                                                  |
| 25 | C44B9.2        | Novel                                           | Unknown                                | WormBase                                                  |
| 26 | C09H10.9       | Novel                                           | Unknown                                | WormBase                                                  |
| 27 | F42G4.2        | Novel                                           | Unknown                                | WormBase                                                  |
| 28 | F52F12.5       | Novel                                           | Unknown                                | WormBase                                                  |
| 29 | T05F1.5        | Novel                                           | Unknown                                | WormBase                                                  |

<sup>a</sup> Biochemical functions are predicted from protein domains or homology with characterized proteins.

<sup>b</sup> Biological functions are deduced from mutant phenotypes.

<sup>c</sup> Protein contains an N-terminal transmembrane helix.



- Ellis, R. E., and J. Kimble, 1995 The *fog-3* gene and regulation of cell fate in the germ line of *Caenorhabditis elegans*. *Genetics* 139: 561-577.
- Ewald, C. Y., D. A. Raps, and C. Li, 2012 APL-1, the Alzheimer's Amyloid precursor protein in *Caenorhabditis elegans*, modulates multiple metabolic pathways throughout development. *Genetics* 191 (2): 493-507.
- Hermann, G. J., L. K. Schroeder, C. A. Hieb, A. M. Kershner, B. M. Rabbitts *et al.*, 2005 Genetic analysis of lysosomal trafficking in *Caenorhabditis elegans*. *Molecular Biology of the Cell* 16 (7): 3273-3288.
- Kim, Y., and H. Sun, 2007 Functional genomic approach to identify novel genes involved in the regulation of oxidative stress resistance and animal lifespan. *Aging Cell* 6 (4): 489-503.
- Krogh, A., B. Larsson, G. von Heijne, and E. L. Sonnhammer, 2001 Predicting transmembrane protein topology with a hidden Markov model: application to complete genomes. *Journal of Molecular Biology* 305 (3): 567-580.
- Mulder, N. J., R. Apweiler, T. K. Attwood, A. Bairoch, D. Barrell *et al.*, 2003 The InterPro Database, 2003 brings increased coverage and new features. *Nucleic Acids Research* 31 (1): 315-318.
- Olivier-Mason, A., M. Wojtyniak, R. V. Bowie, I. V. Nechipurenko, O. E. Blacque *et al.*, 2013 Transmembrane protein OSTA-1 shapes sensory cilia morphology via regulation of intracellular membrane trafficking in *C. elegans*. *Development* 140 (7): 1560-1572.
- Petersen, T. N., S. Brunak, G. von Heijne, and H. Nielsen, 2011 SignalP 4.0: discriminating signal peptides from transmembrane regions. *Nature Methods* 8 (10): 785-786.
- Sun, Y., P. Yang, Y. Zhang, X. Bao, J. Li *et al.*, 2011 A genome-wide RNAi screen identifies genes regulating the formation of P bodies in *C. elegans* and their functions in NMD and RNAi. *Protein Cell* 2 (11): 918-939.

**Table 2. Block III RNAs, their protein products and germline roles**

|    | <b>Block III RNA</b>         | <b>Protein</b>                                                | <b>Germline function</b>                                                | <b>References<sup>c</sup></b>                              |
|----|------------------------------|---------------------------------------------------------------|-------------------------------------------------------------------------|------------------------------------------------------------|
| 1  | <i>gld-1</i> <sup>a,b</sup>  | STAR RNA-binding protein                                      | Oogenesis; spermatogenesis; embryogenesis                               | Francis <i>et al.</i> (1995); Jan <i>et al.</i> (1999)     |
| 2  | <i>larp-1</i> <sup>a,b</sup> | La-related RNA-binding protein                                | Oogenesis                                                               | Nykamp <i>et al.</i> (2008)                                |
| 3  | <i>wago-4</i> <sup>a</sup>   | Argonaute, miRNA-directed RNA-binding protein                 | Unknown                                                                 | Vastenhouw <i>et al.</i> (2003)                            |
| 4  | <i>ppw-2</i> <sup>a</sup>    | Argonaute                                                     | Unknown                                                                 |                                                            |
| 5  | <i>prg-1</i> <sup>a,b</sup>  | Argonaute                                                     | Embryogenesis; Spermatogenesis                                          | Wang and Reinke (2008); PIWI, Batista <i>et al.</i> (2008) |
| 6  | T07A9.14 <sup>a</sup>        | Ribosomal subunit                                             | Oogenesis; early larval development                                     | Green <i>et al.</i> (2011)                                 |
| 7  | <i>ifet-1</i> <sup>b</sup>   | eIF4E-transporter                                             | Meiotic prophase; embryogenesis                                         | Sengupta <i>et al.</i> (2013); Green <i>et al.</i> (2011)  |
| 8  | <i>cgh-1</i> <sup>a,b</sup>  | DEAD-box RNA helicase, RNA-dependent FBF-2 protein interactor | Oogenesis; spermatogenesis; embryogenesis; lowers germ cell apoptosis   | Audhya <i>et al.</i> (2005) Boag <i>et al.</i> (2005)      |
| 9  | <i>cpb-3</i> <sup>a</sup>    | RNA-binding protein                                           | Oogenesis; embryogenesis; lowers germ cell apoptosis                    | Boag <i>et al.</i> (2005)                                  |
| 10 | <i>ncl-1</i> <sup>a</sup>    | RNA-binding protein                                           | Nucleolar function; ribosome biogenesis                                 | Korčeková <i>et al.</i> (2012) Voutev <i>et al.</i> (2006) |
| 11 | <i>car-1</i> <sup>a,b</sup>  | RNA-binding protein                                           | Oogenesis; embryogenesis; lowers germ cell apoptosis                    | Audhya <i>et al.</i> (2005) Boag <i>et al.</i> (2005)      |
| 12 | <i>smk-1</i>                 | Nuclear protein                                               | Oogenesis; embryogenesis                                                | Wolff <i>et al.</i> (2006)                                 |
| 13 | <i>spat-2</i>                | Low complexity protein                                        | Embryogenesis                                                           | Labbé <i>et al.</i> (2006)                                 |
| 14 | <i>sip-1</i>                 | Small heat shock protein                                      | Embryogenesis                                                           | Linder <i>et al.</i> (1996)                                |
| 15 | <i>egg-6</i>                 | Leucine-rich repeat protein                                   | Oogenesis; embryogenesis                                                | Green <i>et al.</i> (2011)                                 |
| 16 | <i>trcs-1</i>                | Arylacetamide deacetylase and microsomal lipase               | Oogenesis; spermatogenesis; embryogenesis; promotes germ cell apoptosis | Kubagawa <i>et al.</i> (2006)                              |
| 17 | <i>ima-3</i>                 | Importin alpha                                                | Embryogenesis                                                           |                                                            |
| 18 | <i>kin-19</i>                | Serine/threonine kinase                                       | Oogenesis; embryogenesis; lowers germ cell apoptosis                    | Shirayama <i>et al.</i> (2006)                             |
| 19 | <i>gck-1</i>                 | Germinal center kinase                                        | Oogenesis; embryogenesis; lowers germ cell apoptosis                    | Schouest <i>et al.</i> (2009)                              |
| 20 | <i>plk-3</i>                 | Polo-like kinase                                              | Unknown                                                                 |                                                            |
| 21 | <i>htp-1</i>                 | HORMA-domain protein                                          | Chromatid separation                                                    | Severson <i>et al.</i> (2009)                              |

<sup>a</sup>Protein is an RNA-binding protein.

<sup>b</sup>Protein is a P-granule component.

<sup>c</sup>References are not meant to be complete. See WormBase <http://www.wormbase.org/> for additional references.

- Audhya, A., F. Hyndman, I. X. McLeod, A. S. Maddox, J. R. Yates, 3rd *et al.*, 2005 A complex containing the Sm protein CAR-1 and the RNA helicase CGH-1 is required for embryonic cytokinesis in *Caenorhabditis elegans*. *The Journal of Cell Biology* 171 (2): 267-279.
- Batista, P. J., J. G. Ruby, J. M. Claycomb, R. Chiang, N. Fahlgren *et al.*, 2008 PRG-1 and 21U-RNAs interact to form the piRNA complex required for fertility in *C. elegans*. *Molecular Cell* 31 (1): 67-78.
- Boag, P. R., A. Nakamura, and T. K. Blackwell, 2005 A conserved RNA-protein complex component involved in physiological germline apoptosis regulation in *C. elegans*. *Development* 132 (22): 4975-4986.
- Francis, R., M. K. Barton, J. Kimble, and T. Schedl, 1995 *gld-1*, a tumor suppressor gene required for oocyte development in *Caenorhabditis elegans*. *Genetics* 139 (2): 579-606.
- Green, R. A., H. L. Kao, A. Audhya, S. Arur, J. R. Mayers *et al.*, 2011 A high-resolution *C. elegans* essential gene network based on phenotypic profiling of a complex tissue. *Cell* 145 (3): 470-482.
- Jan, E., C. K. Motzny, L. E. Graves, and E. B. Goodwin, 1999 The STAR protein, GLD-1, is a translational regulator of sexual identity in *Caenorhabditis elegans*. *The EMBO Journal* 18 (1): 258-269.
- Korčeková, D., A. Gombitová, I. Raška, D. Cmarko, and C. Lanctôt, 2012 Nucleologenesis in the *Caenorhabditis elegans* embryo. *PLoS one* 7 (7): e40290.
- Kubagawa, H. M., J. L. Watts, C. Corrigan, J. W. Edmonds, E. Sztul *et al.*, 2006 Oocyte signals derived from polyunsaturated fatty acids control sperm recruitment *in vivo*. *Nature Cell Biology* 8 (10): 1143-1148.
- Labbé, J. C., A. Pacquelet, T. Marty, and M. Gotta, 2006 A genomewide screen for suppressors of *par-2* uncovers potential regulators of PAR protein-dependent cell polarity in *Caenorhabditis elegans*. *Genetics* 174 (1): 285-295.
- Linder, B., Z. Jin, J. H. Freedman, and C. S. Rubin, 1996 Molecular characterization of a novel, developmentally regulated small embryonic chaperone from *Caenorhabditis elegans*. *The Journal of Biological Chemistry* 271 (47): 30158-30166.
- Nykamp, K., M.-H. Lee, and J. Kimble, 2008 *C. elegans* La-related protein, LARP-1, localizes to germline P bodies and attenuates Ras-MAPK signaling during oogenesis. *RNA* 14 (7): 1378-1389.
- Schouest, K. R., Y. Kurasawa, T. Furuta, N. Hisamoto, K. Matsumoto *et al.*, 2009 The germinal center kinase GCK-1 is a negative regulator of MAP kinase activation and apoptosis in the *C. elegans* germline. *PLoS one* 4 (10): e7450.
- Sengupta, M. S., W. Y. Low, J. R. Patterson, H. M. Kim, A. Traven *et al.*, 2013 *ifet-1* is a broad-scale translational repressor required for normal P granule formation in *C. elegans*. *Journal of Cell Science* 126 (Pt 3): 850-859.
- Severson, A. F., L. Ling, V. van Zuylen, and B. J. Meyer, 2009 The axial element protein HTP-3 promotes cohesin loading and meiotic axis assembly in *C. elegans* to implement the meiotic program of chromosome segregation. *Genes & Development* 23 (15): 1763-1778.
- Shirayama, M., M. C. Soto, T. Ishidate, S. Kim, K. Nakamura *et al.*, 2006 The conserved kinases CDK-1, GSK-3, KIN-19, and MBK-2 promote OMA-1 destruction to regulate the oocyte-to-embryo transition in *C. elegans*. *Current Biology* 16 (1): 47-55.
- Vastenhouw, N. L., S. E. Fischer, V. J. Robert, K. L. Thijssen, A. G. Fraser *et al.*, 2003 A genome-wide screen identifies 27 genes involved in transposon silencing in *C. elegans*. *Current Biology* 13 (15): 1311-1316.
- Voutev, R., D. J. Killian, J. H. Ahn, and E. J. Hubbard, 2006 Alterations in ribosome biogenesis cause specific defects in *C. elegans* hermaphrodite gonadogenesis. *Developmental Biology* 298 (1): 45-58.
- Wang, G., and V. Reinke, 2008 A *C. elegans* Piwi, PRG-1, regulates 21U-RNAs during spermatogenesis. *Current Biology* 18 (12): 861-867.
- Wolff, S., H. Ma, D. Burch, G. A. Maciel, T. Hunter *et al.*, 2006 SMK-1, an essential regulator of DAF-16-mediated longevity. *Cell* 124 (5): 1039-1053.
